# Supplementary material for: Transforming PPh3into bidentate phosphine ligands at Ru–Zn heterobimetallic complexes
Source: Royal Society of Chemistry journal article supplement (doi:10.1039/c9dt03106e), 2019-01-01
Supplement: c9dt03106e1.pdf [file c9dt03106e1.pdf]

## SUPPORTING INFORMATION

### Transforming PPh<sub>3</sub> into Bidentate Phosphine Ligands at Ru-Zn Heterobimetallic Complexes

Niall O’Leary, Fedor M. Miloserdov, Mary F. Mahon and Michael K. Whittlesey

*Department of Chemistry, University of Bath, Claverton Down, Bath BA2 7AY, U.K.*

|                                                                                                                                  |         |
|----------------------------------------------------------------------------------------------------------------------------------|---------|
| NMR spectra of <b>1</b>                                                                                                          | S2-S4   |
| NMR/IR spectra of <b>2</b>                                                                                                       | S5-S9   |
| NMR spectra of [Ru(PPh <sub>3</sub> ) <sub>3</sub> Cl <sub>2</sub> ]·PPh <sub>3</sub> and ZnMe <sub>2</sub> reaction progression | S10     |
| NMR spectra involving [Ru(BIPHEP)(PPh <sub>3</sub> )HCl]                                                                         | S11-S13 |
| NMR spectra of intermediates <b>I-VI</b>                                                                                         | S14-S22 |
| NMR spectra of <b>3</b>                                                                                                          | S23-S25 |
| NMR spectra of <b>4</b>                                                                                                          | S26-S27 |
| NMR/IR spectra of <b>5</b>                                                                                                       | S28-S30 |
| Crystal data and structure refinement details for <b>1, 3</b> and <b>5</b>                                                       | S31     |

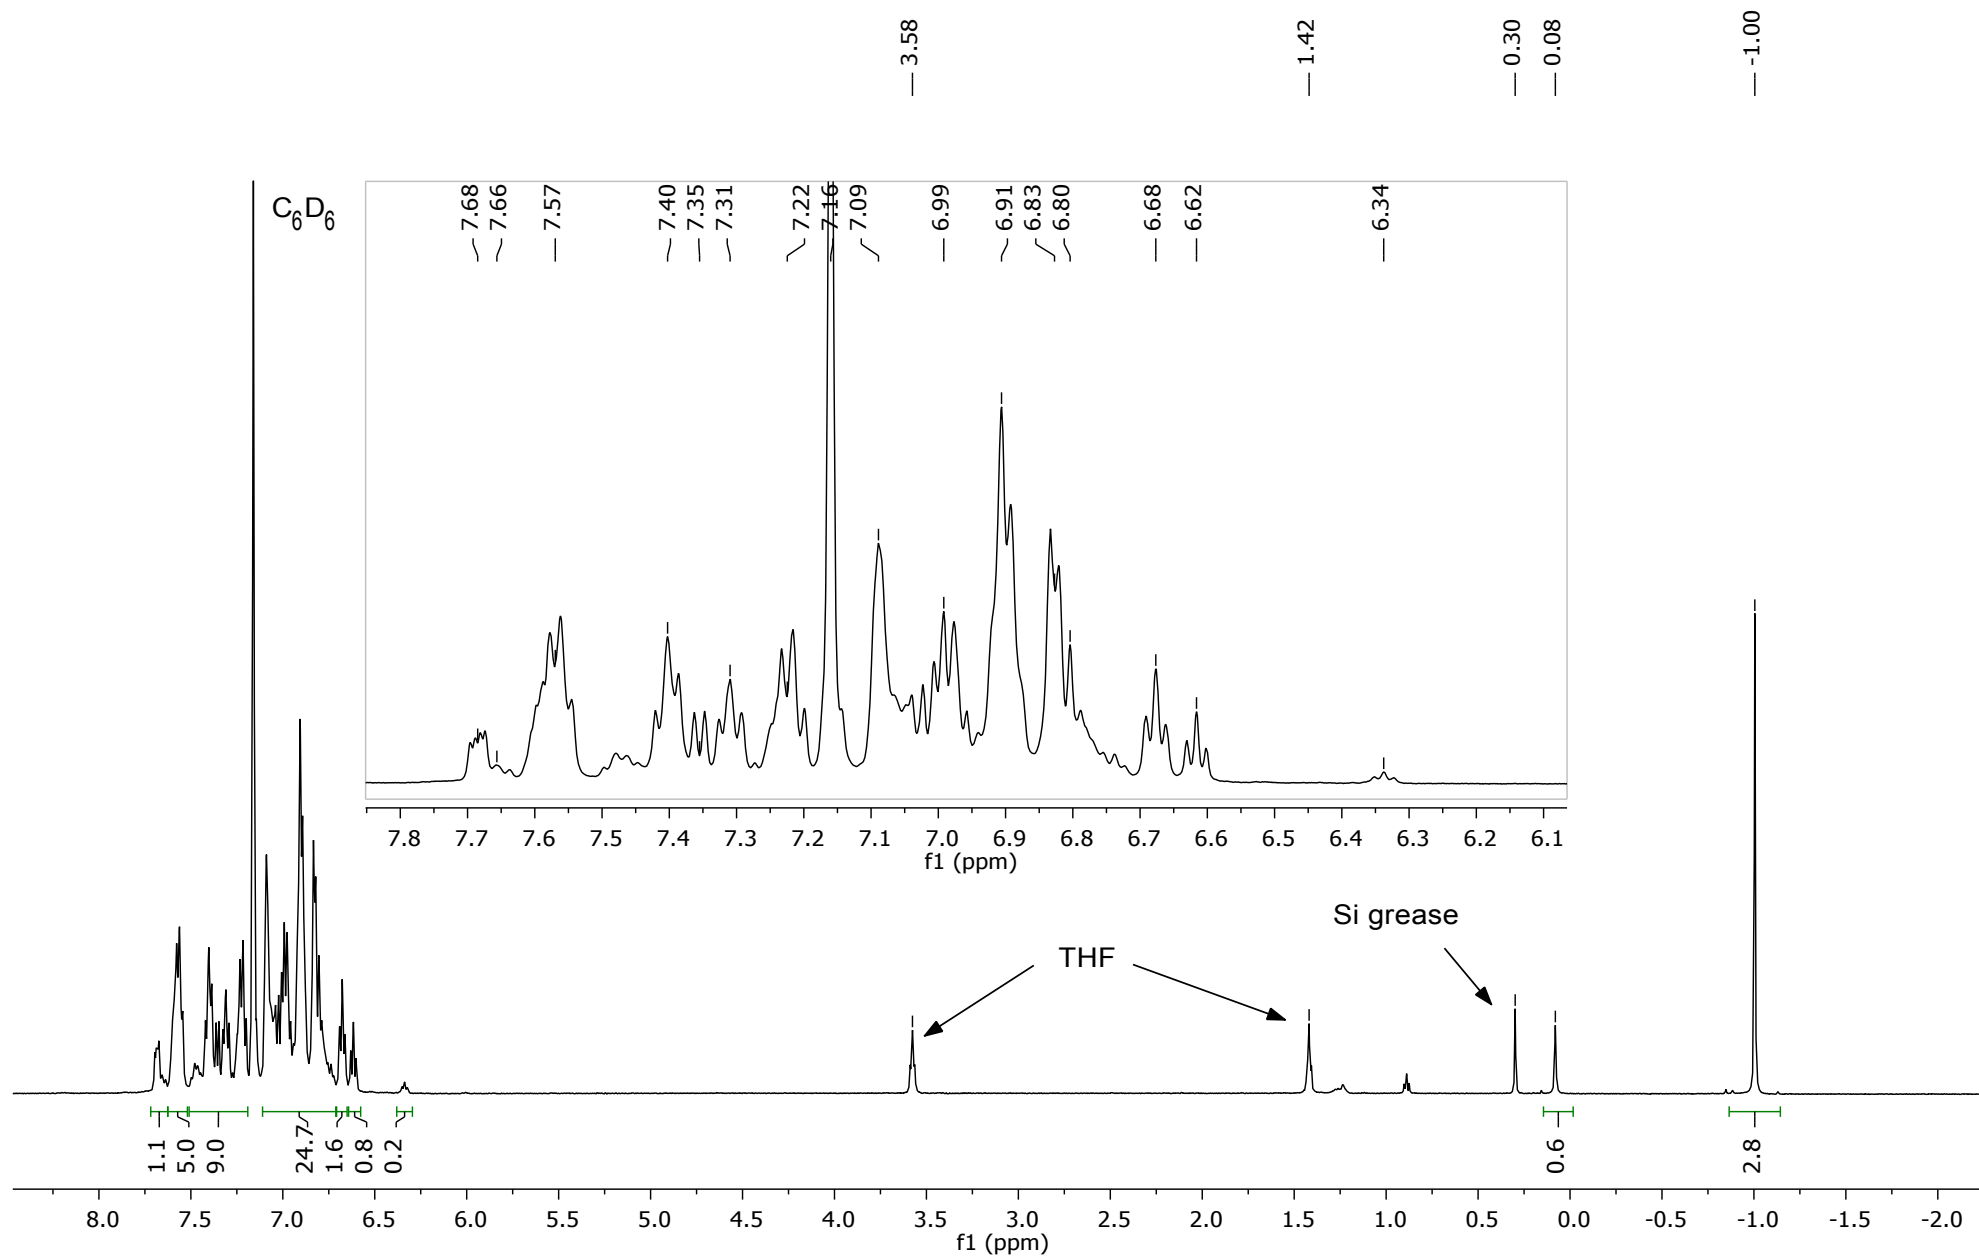

**Fig. S1.** <sup>1</sup>H NMR spectrum (500 MHz, C<sub>6</sub>D<sub>6</sub>, 298 K) of [Ru(dppbz)(PPh<sub>2</sub>(biphenyl'))ZnMe] (**1**).

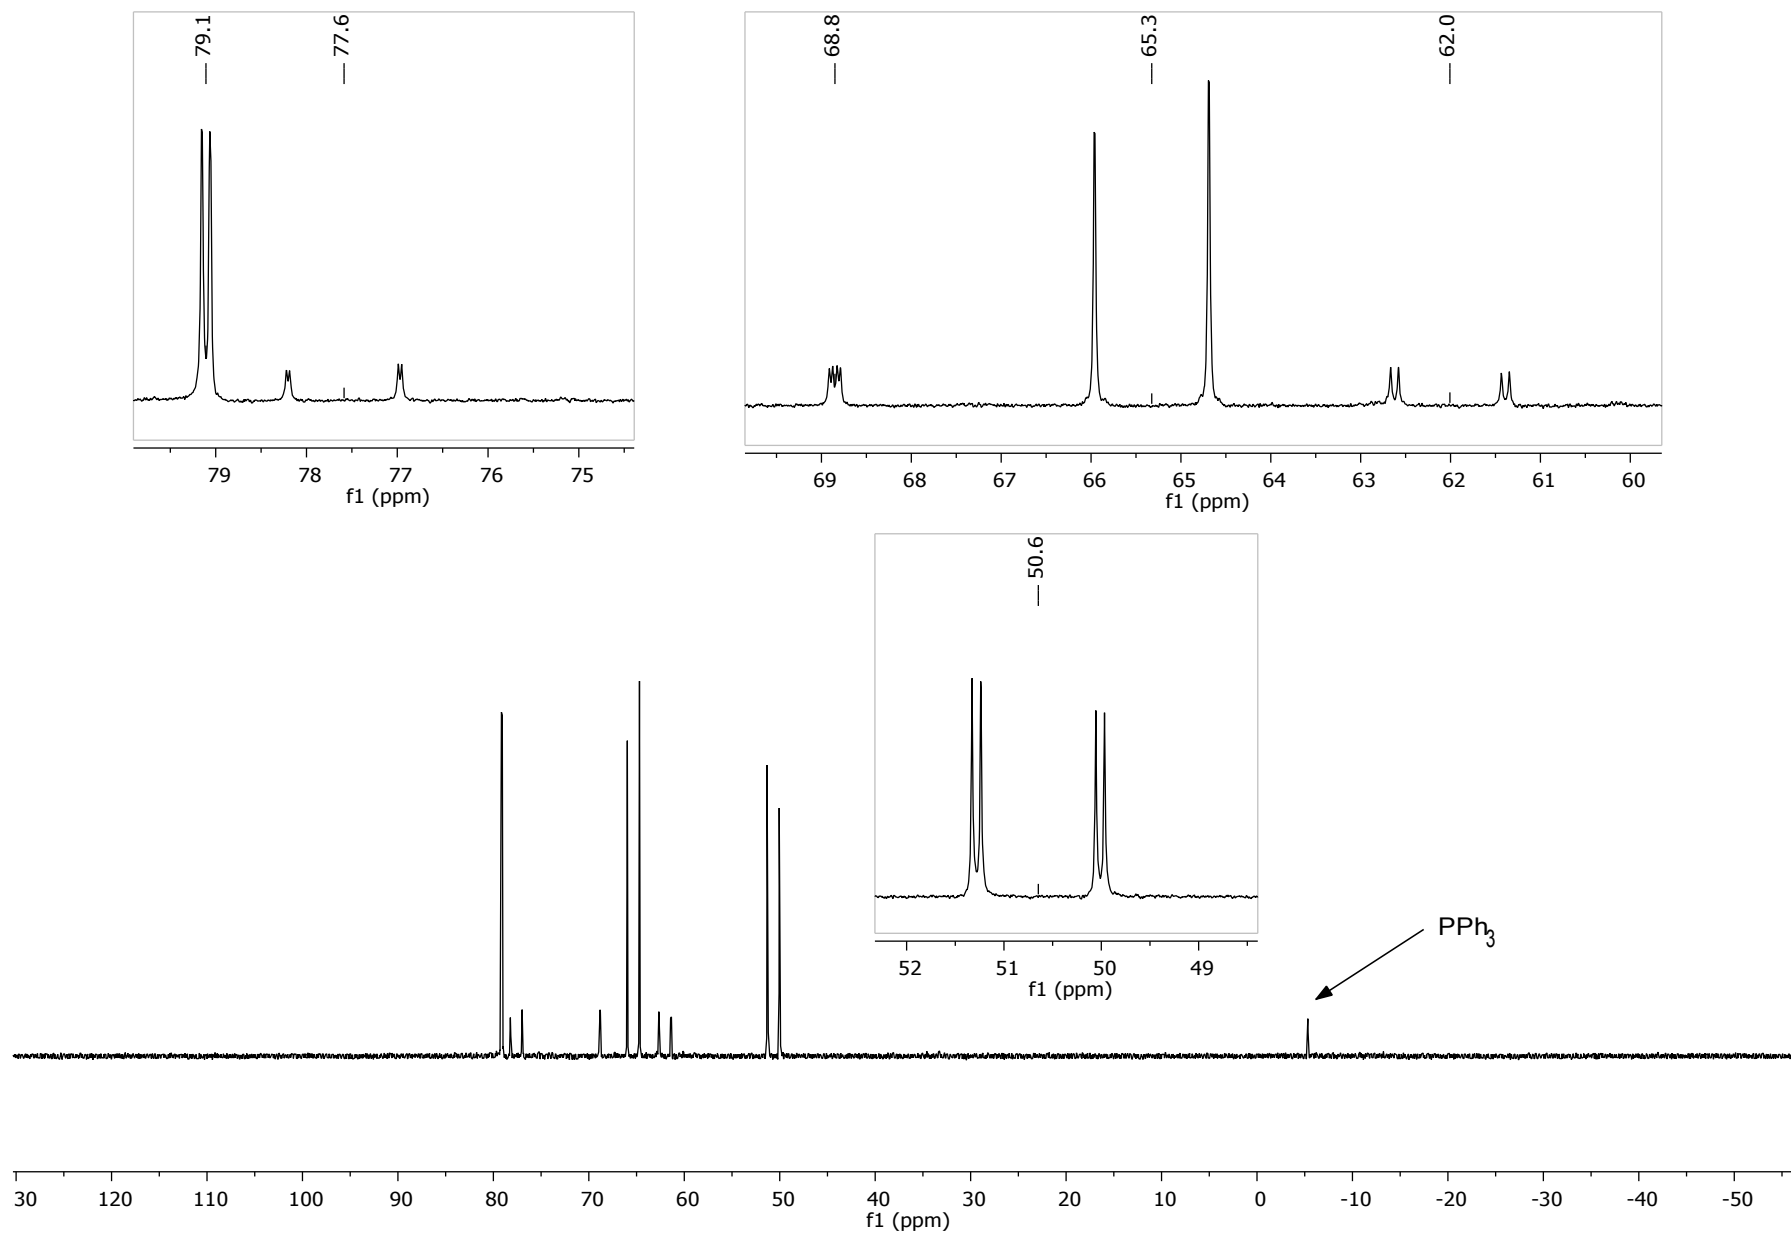

**Fig. S2.**  $^{31}\text{P}\{^1\text{H}\}$  NMR spectrum (202 MHz,  $\text{C}_6\text{D}_6$ , 298 K) of  $[\text{Ru}(\text{dppbz})(\text{PPh}_2(\text{biphenyl}))\text{ZnMe}]$  (1).

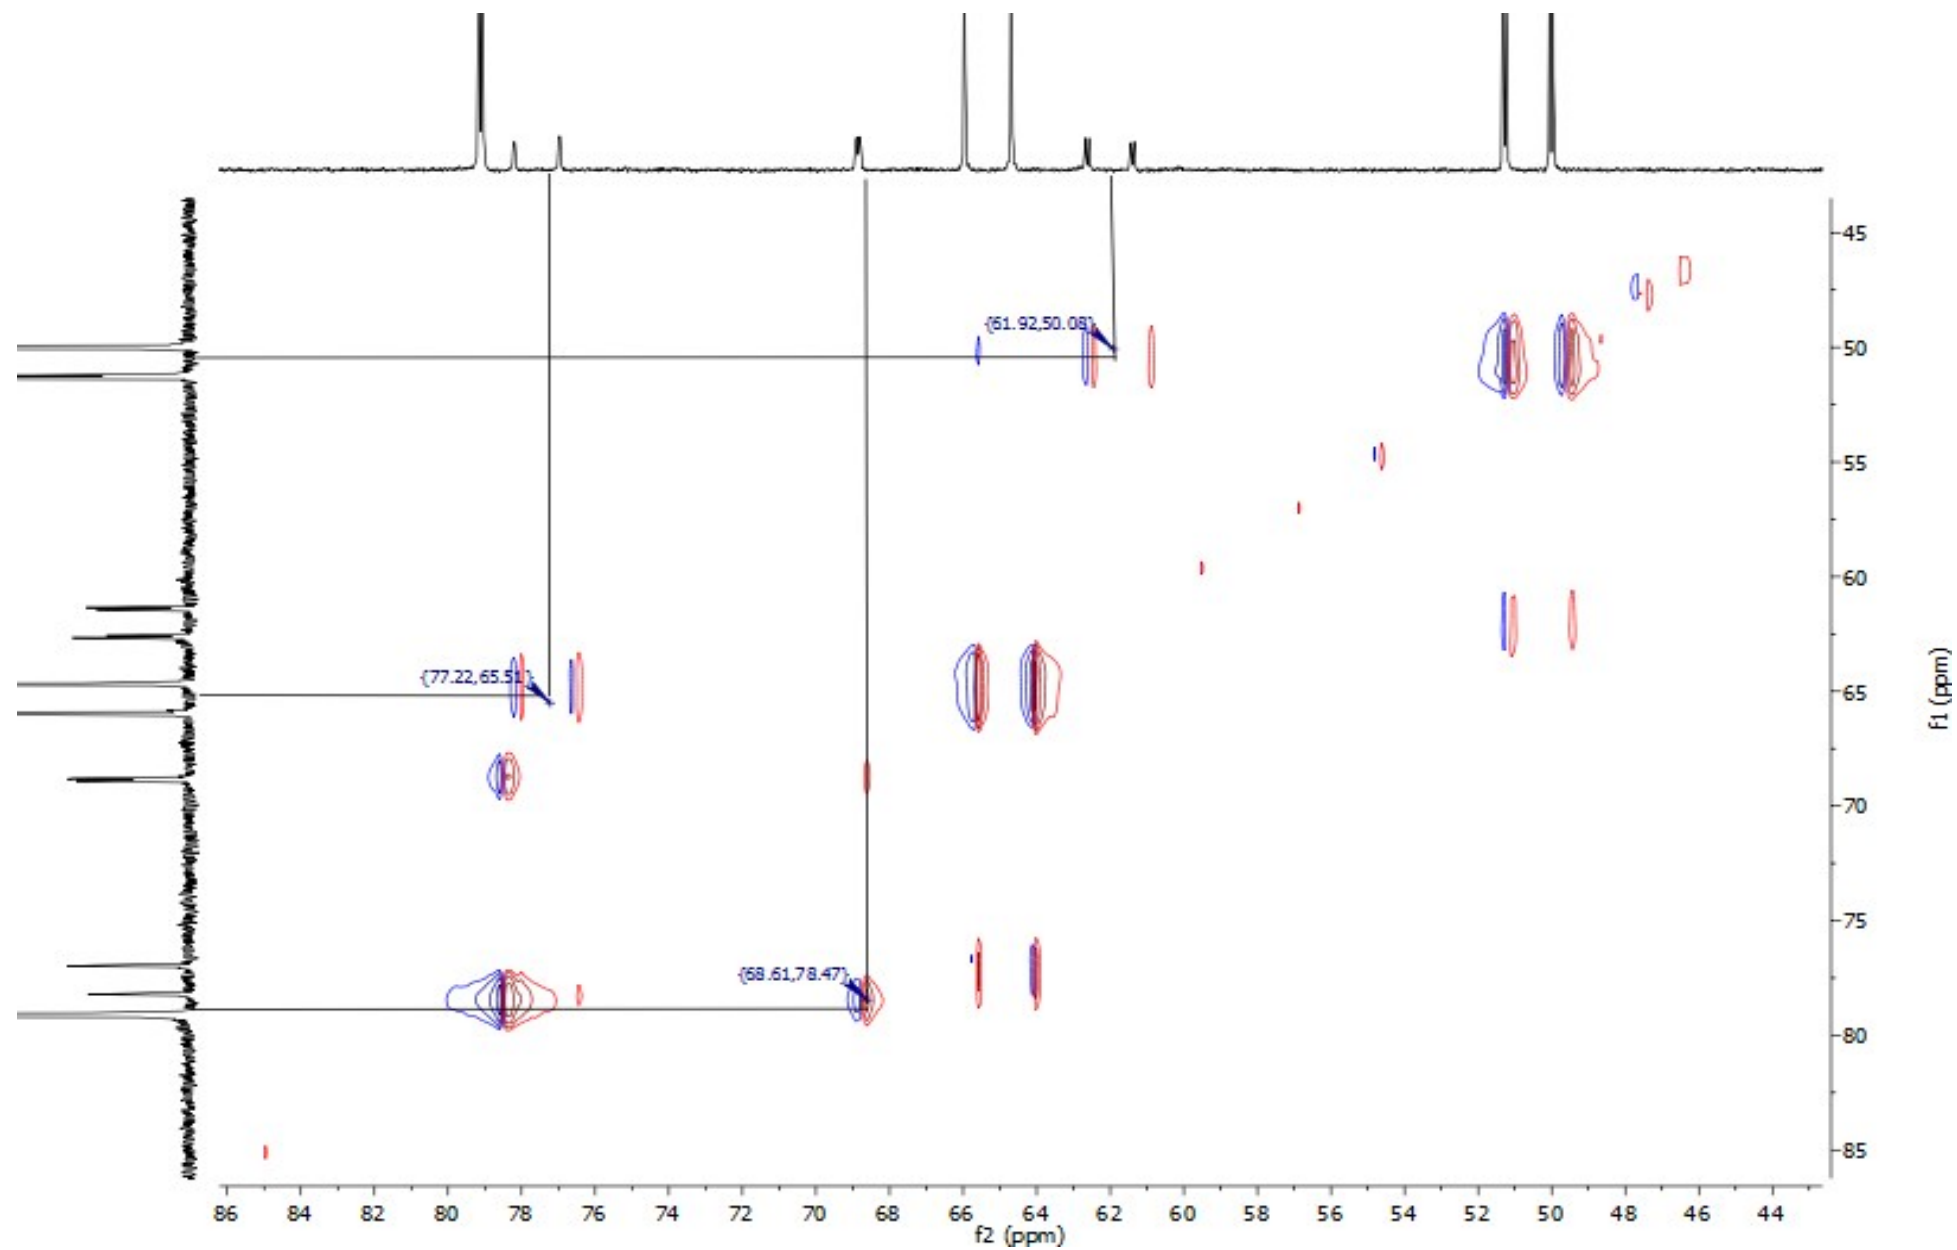

**Fig. S3.**  $^{31}\text{P}\{^1\text{H}\}$  EXSY (202 MHz,  $\text{C}_6\text{D}_6$ , 298 K) of  $[\text{Ru}(\text{dppbz})(\text{PPh}_2(\text{biphenyl}))\text{ZnMe}]$  (**1**).

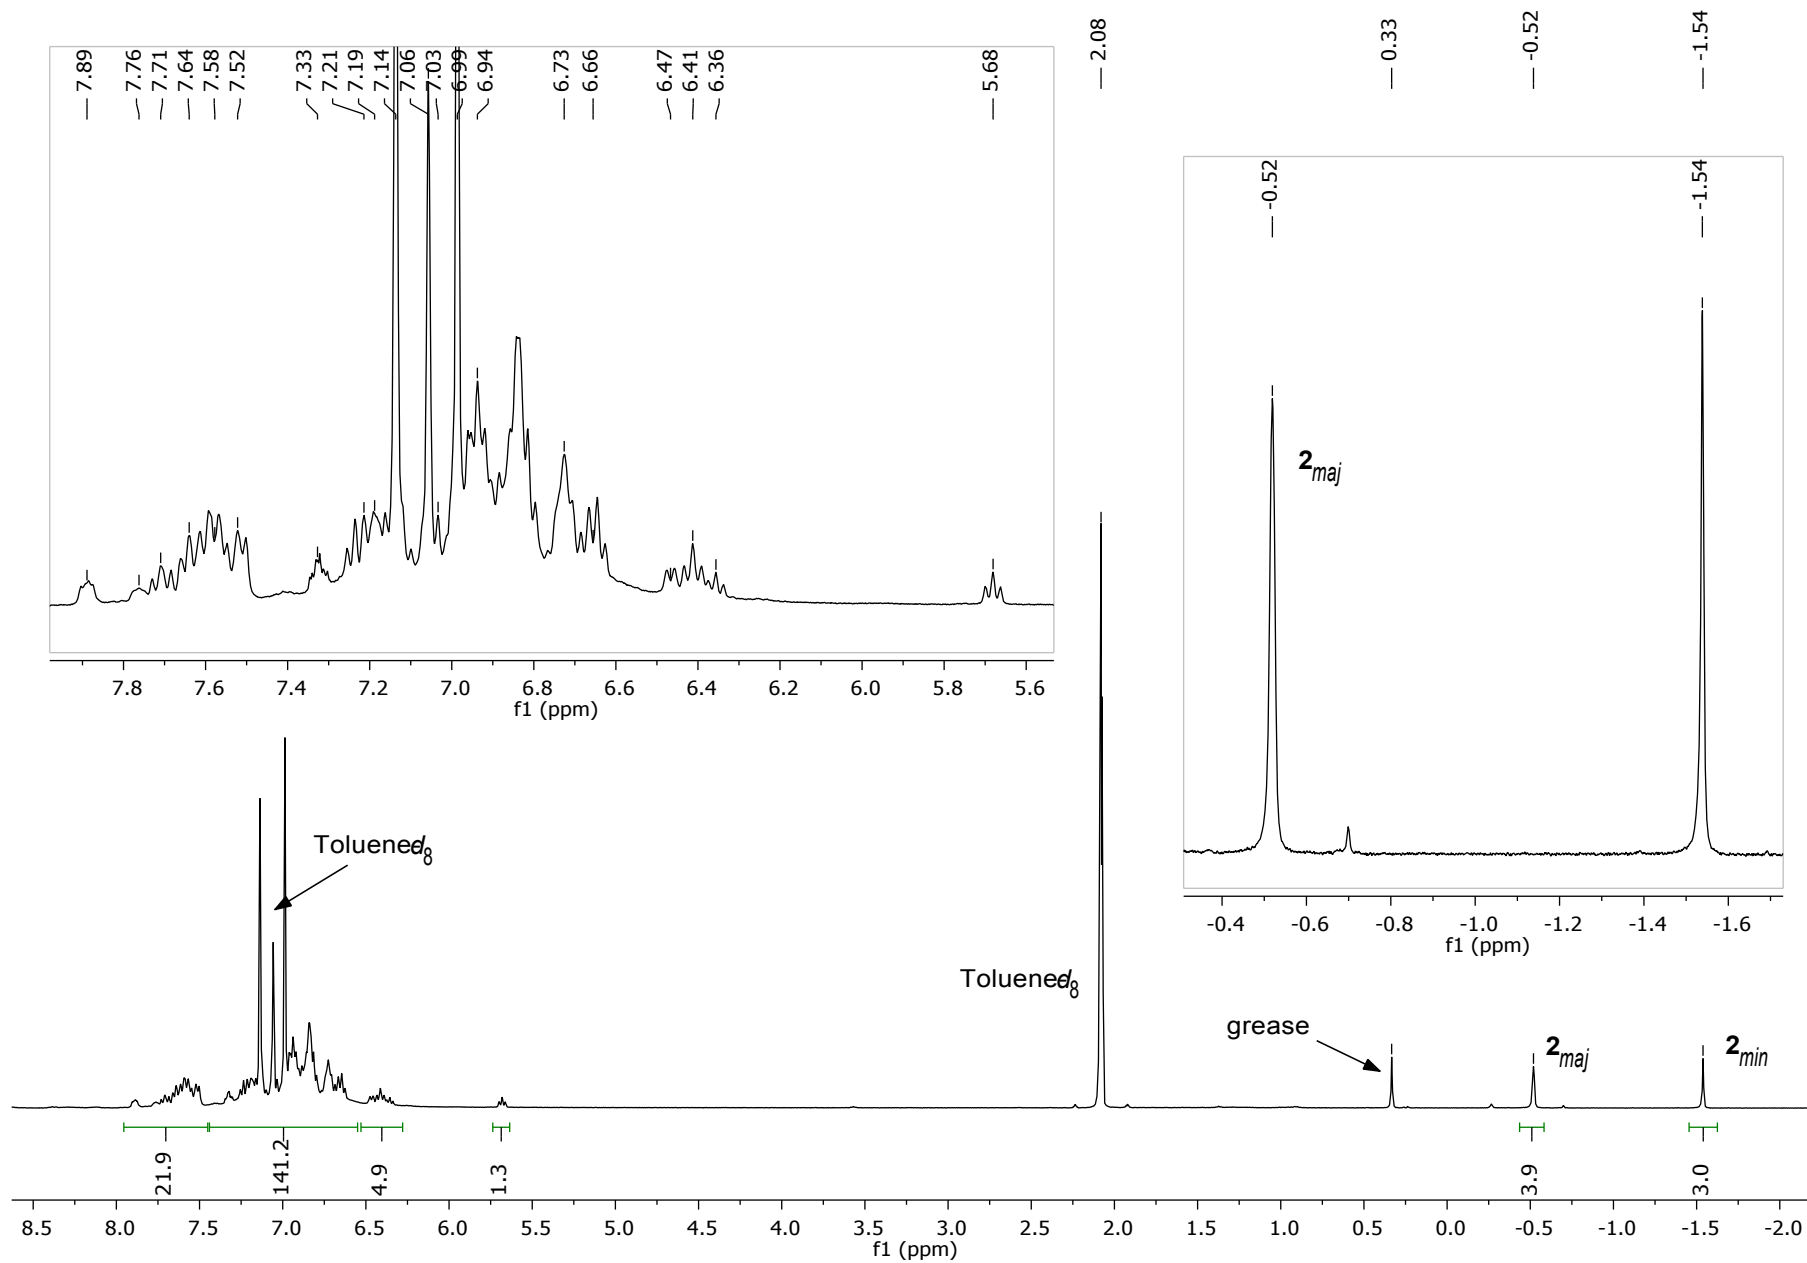

**Fig. S4.**  $^1\text{H}$  NMR spectrum (400 MHz,  $\text{C}_6\text{D}_5\text{CD}_3$ , 223 K) of  $[\text{Ru}(\text{dppbz})(\text{PPh}_2(\text{biphenyl}'))(\text{CO})\text{ZnMe}]$  (**2**), generated from **1** and CO.

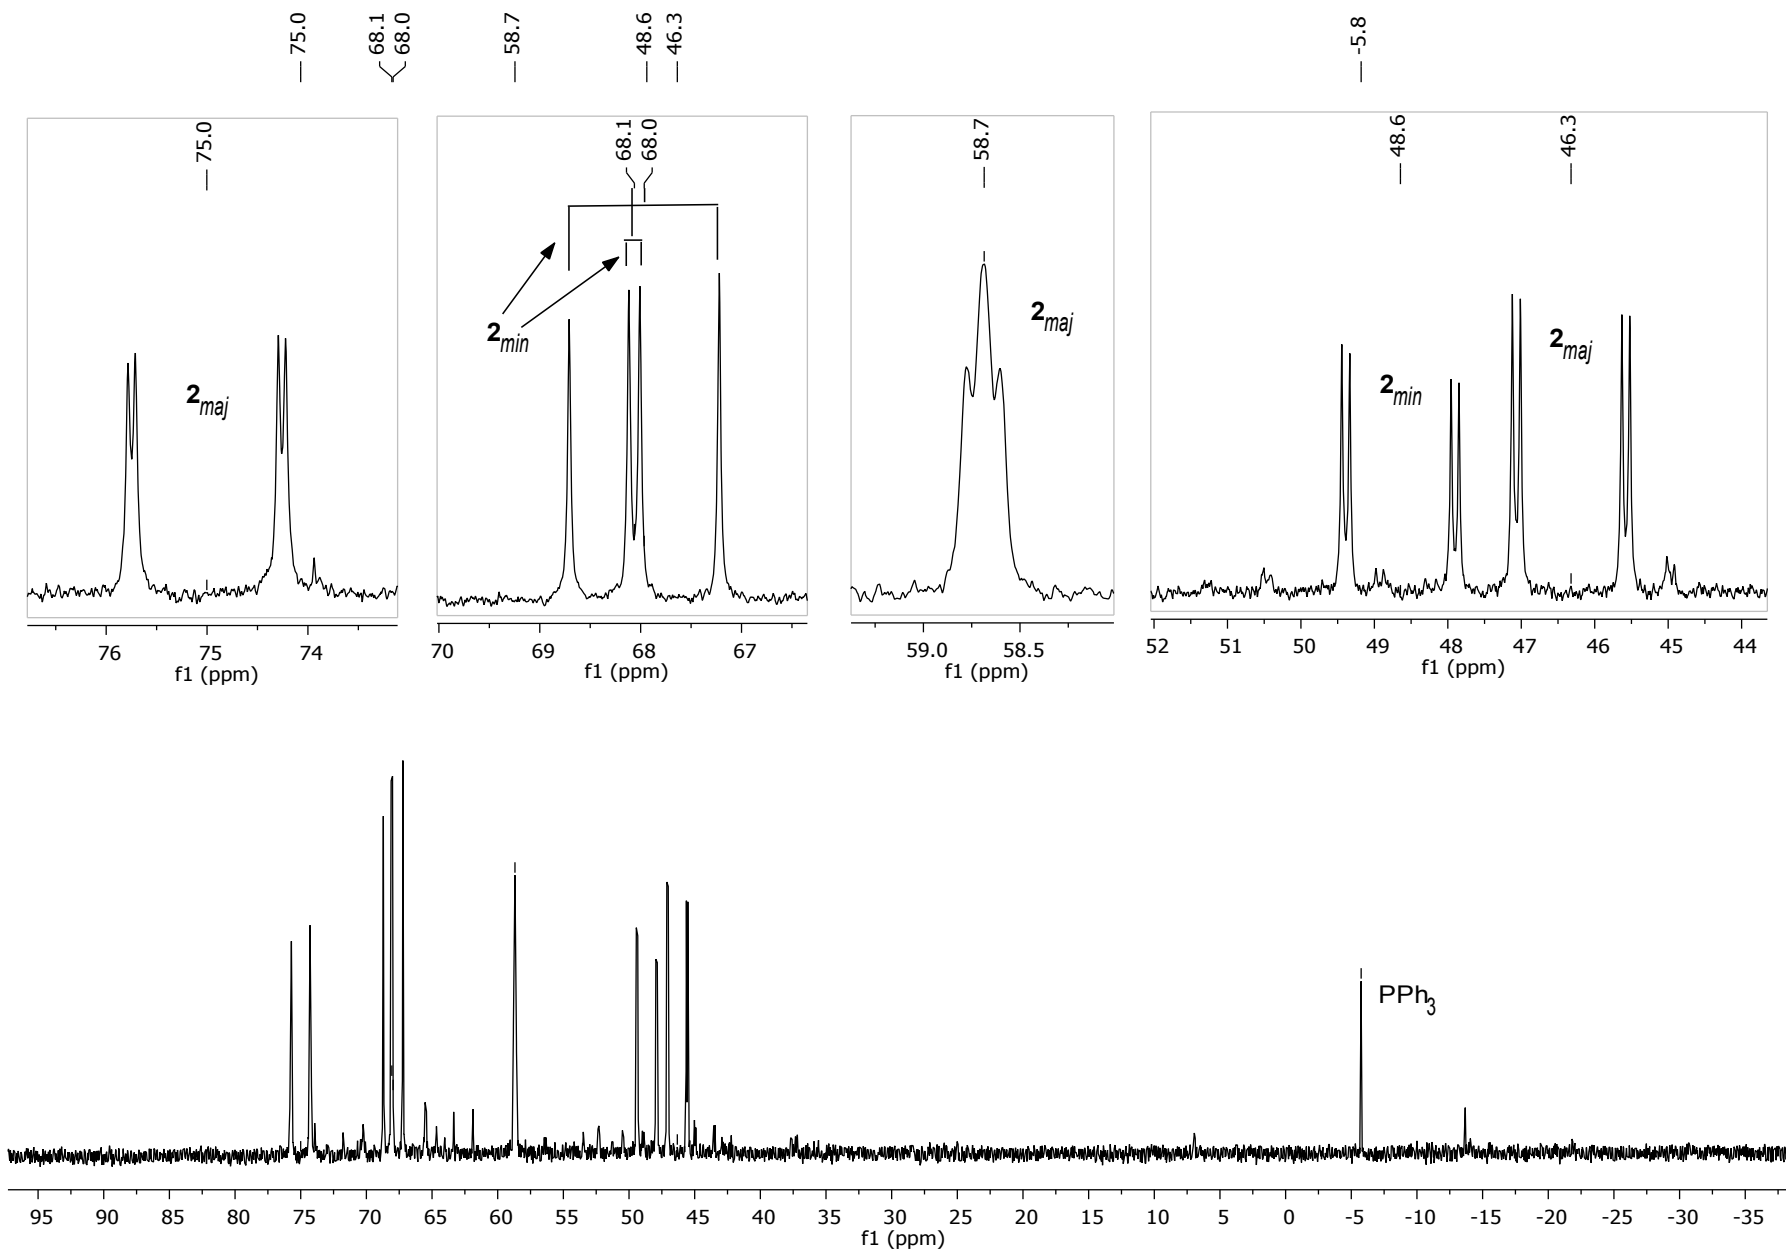

**Fig. S5.**  $^{31}\text{P}\{^1\text{H}\}$  NMR spectrum (162 MHz,  $\text{C}_6\text{D}_5\text{CD}_3$ , 223 K) of  $[\text{Ru}(\text{dppbz})(\text{PPh}_2(\text{biphenyl}))(\text{CO})\text{ZnMe}]$  (**2**), generated from **1** and CO.

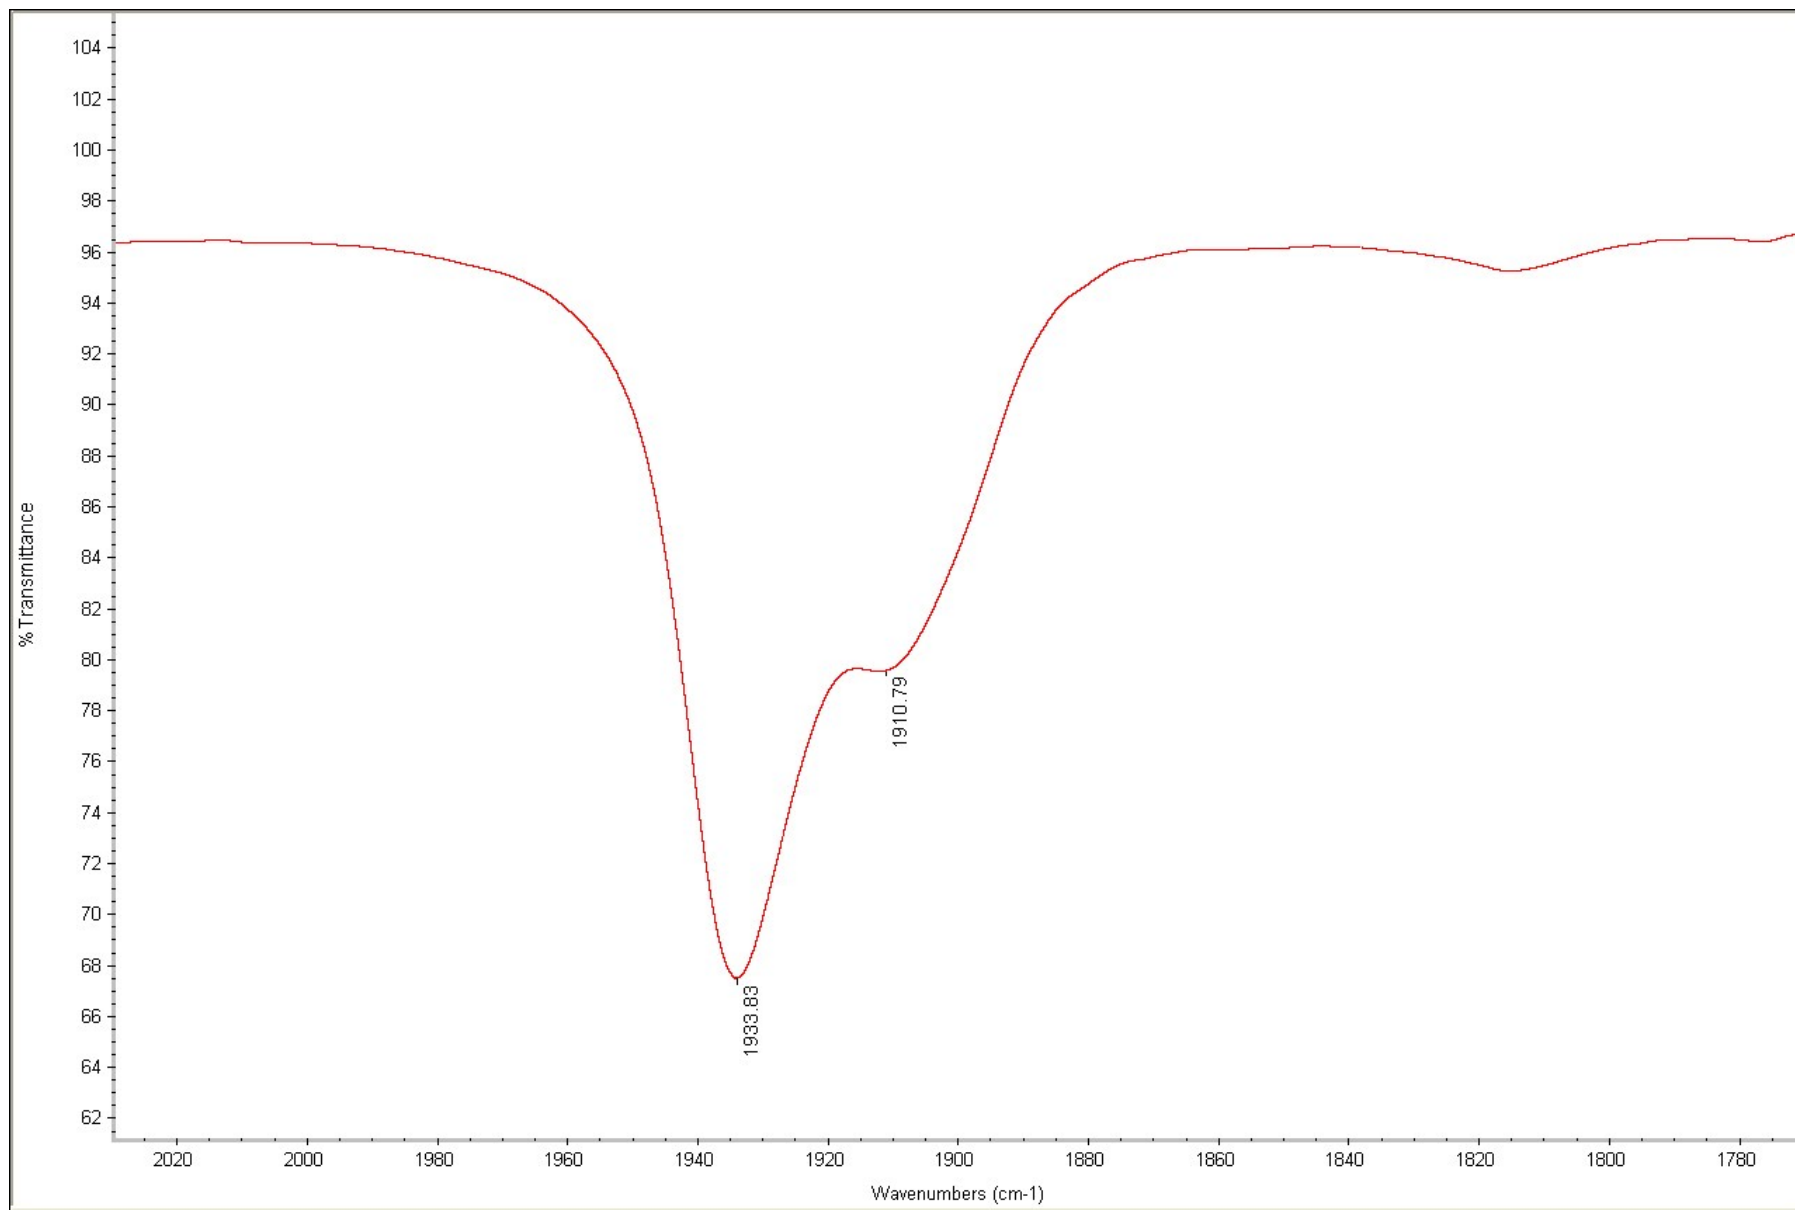

**Fig. S6.** IR spectrum (in  $C_6D_5CD_3$ ) showing carbonyl bands for the two diastereomers of  $Ru(dppbz)(PPh_2(\text{biphenyl}))(\text{CO})ZnMe$  (**2**).

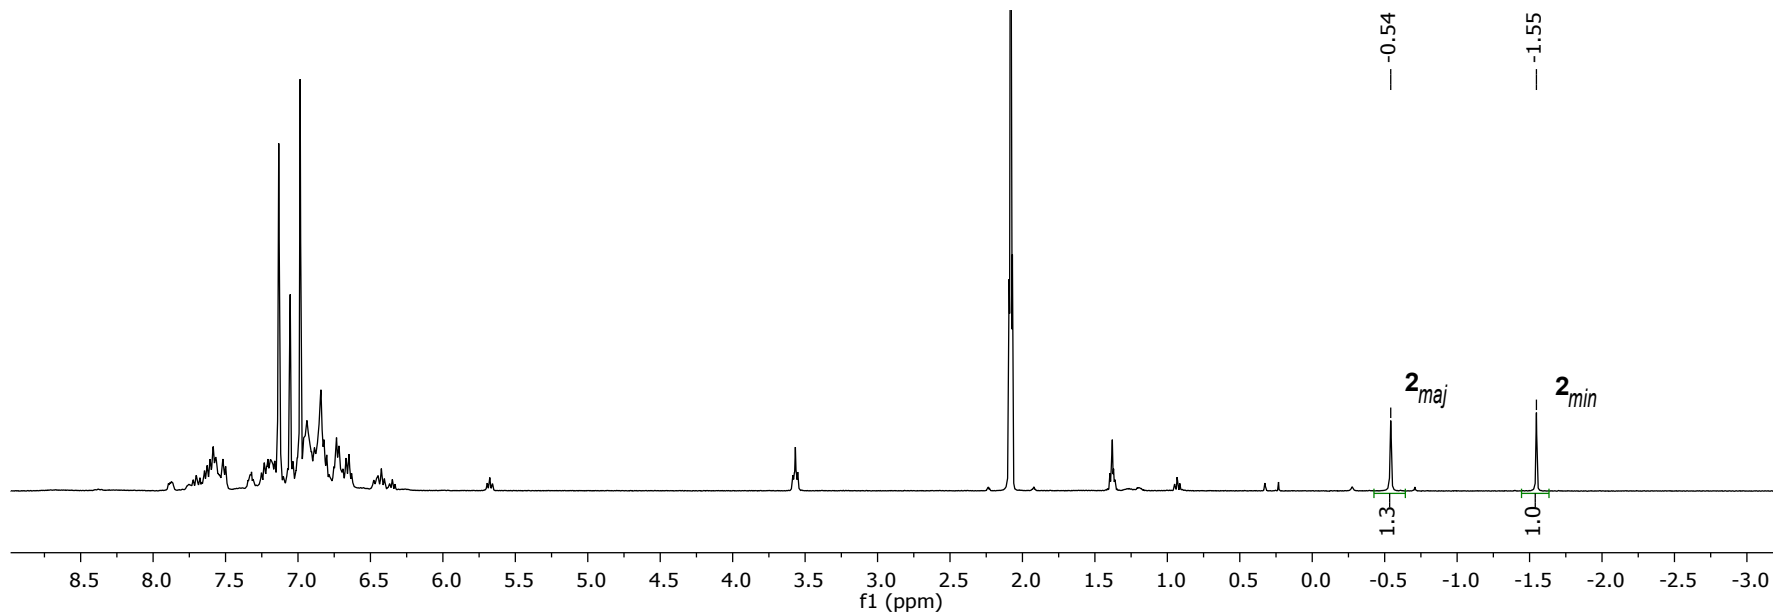

**Fig. S7.**  $^1\text{H}$  NMR spectrum (400 MHz,  $\text{C}_6\text{D}_5\text{CD}_3$ , 223 K) of  $[\text{Ru}(\text{dppbz})(\text{PPh}_2(\text{biphenyl}))(^{13}\text{CO})\text{ZnMe}]$  (**2**), generated from **1** and  $^{13}\text{CO}$ .

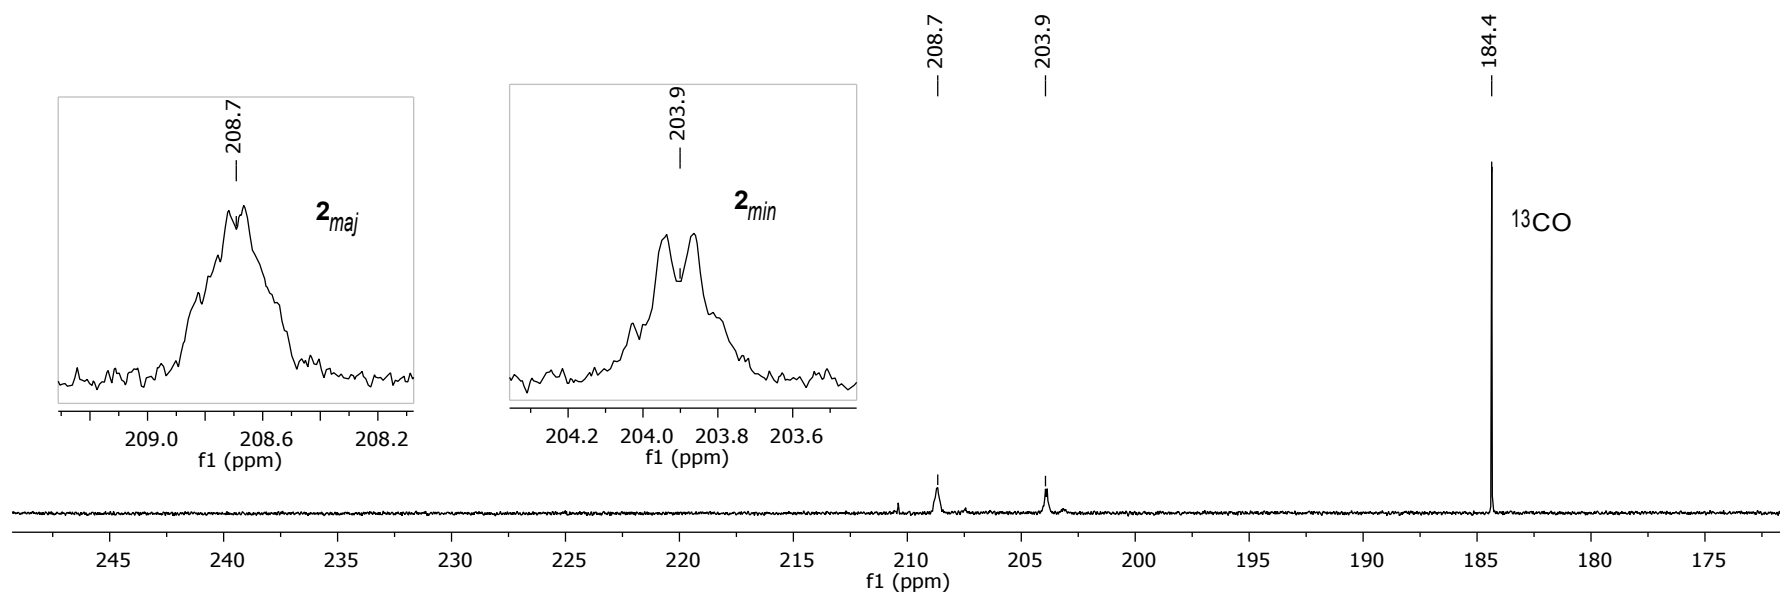

**Fig. S8.**  $^{13}\text{C}\{^1\text{H}\}$  NMR spectrum (101 MHz,  $\text{C}_6\text{D}_5\text{CD}_3$ , 223 K) of  $[\text{Ru}(\text{dppbz})(\text{PPh}_2(\text{biphenyl}))(^{13}\text{CO})\text{ZnMe}]$  (**2**), generated from **1** and  $^{13}\text{CO}$ .



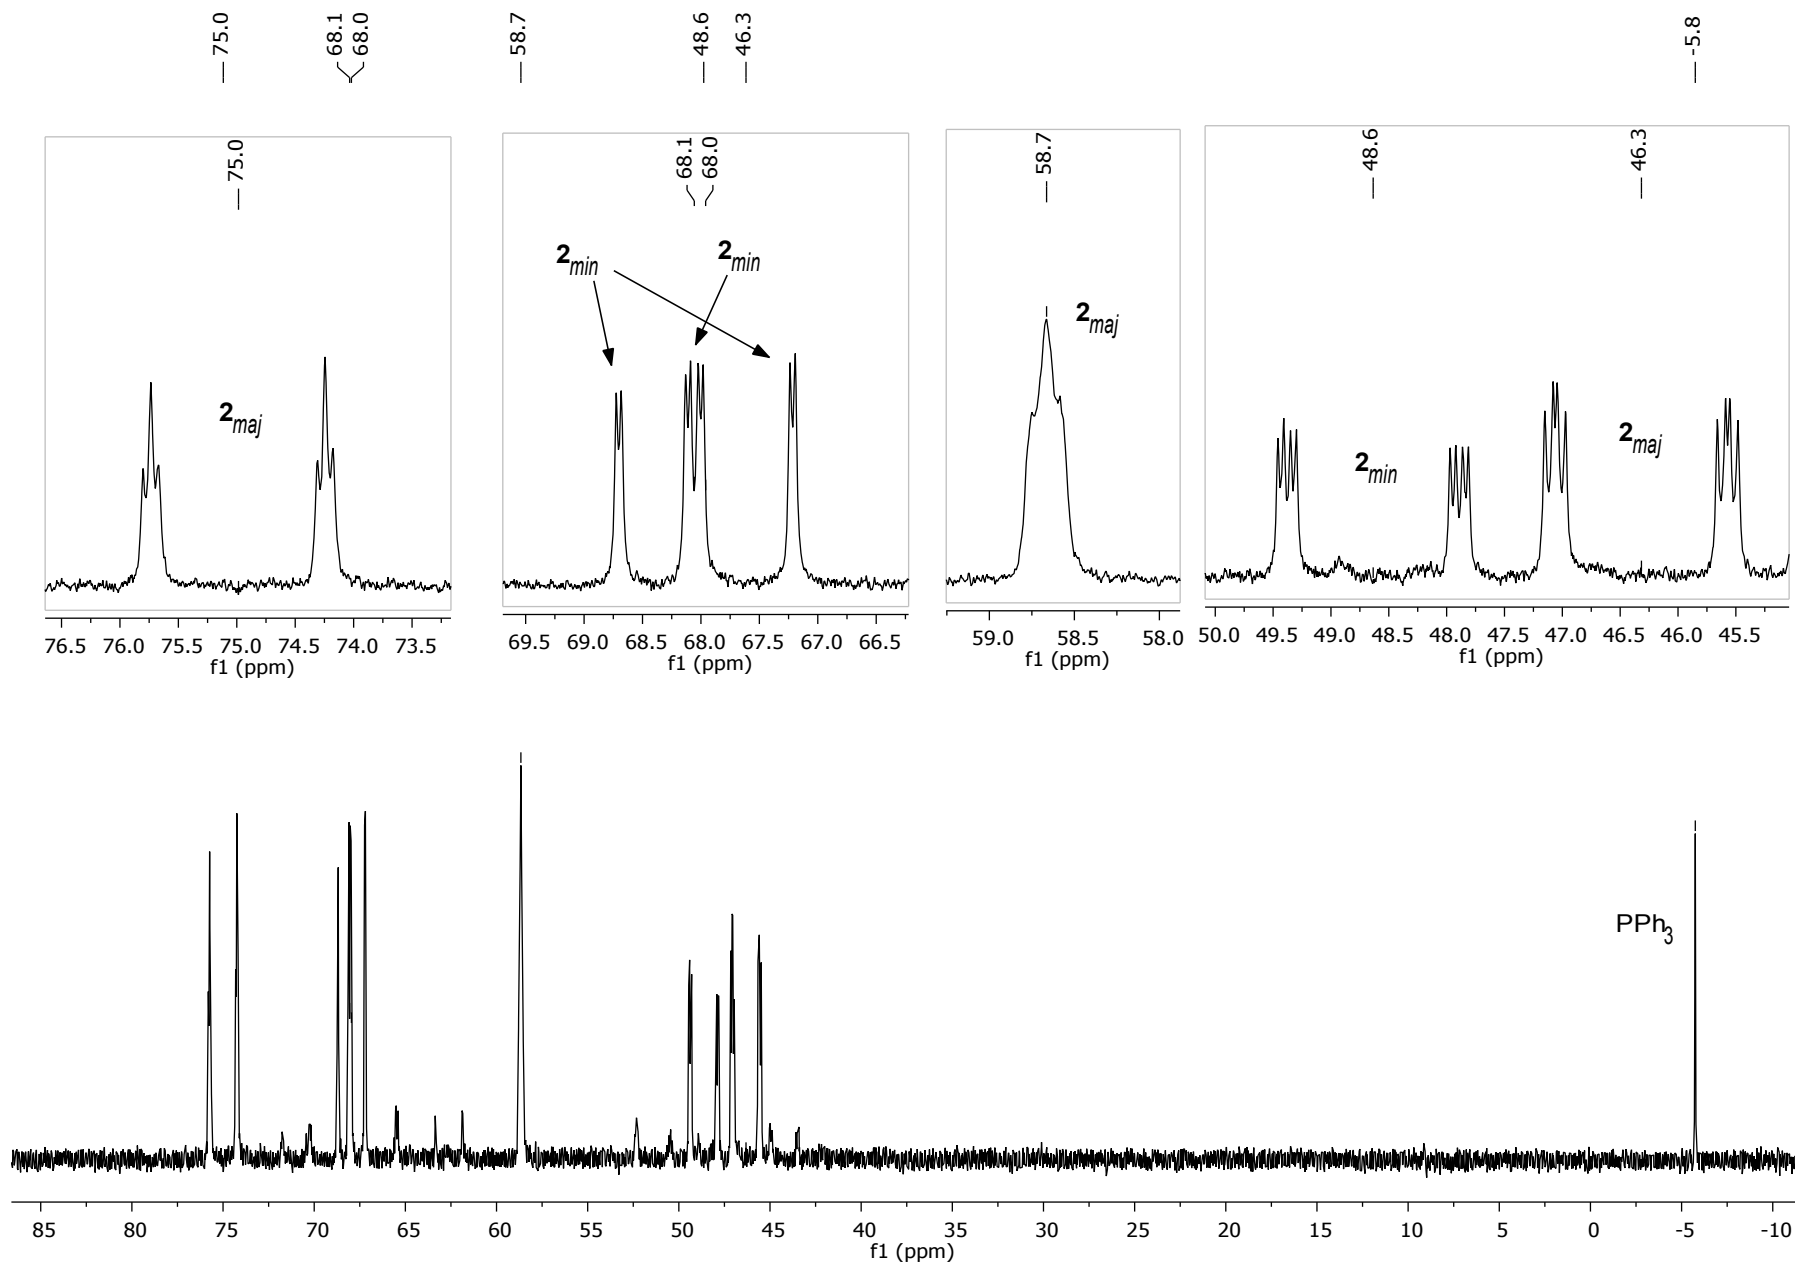

**Fig. S9.**  $^{31}\text{P}\{^1\text{H}\}$  NMR spectrum (162 MHz,  $\text{C}_6\text{D}_5\text{CD}_3$ , 223 K) of  $[\text{Ru}(\text{dppbz})(\text{PPh}_2(\text{biphenyl}))(^{13}\text{CO})\text{ZnMe}]$  (**2**), generated from **1** and  $^{13}\text{CO}$ .

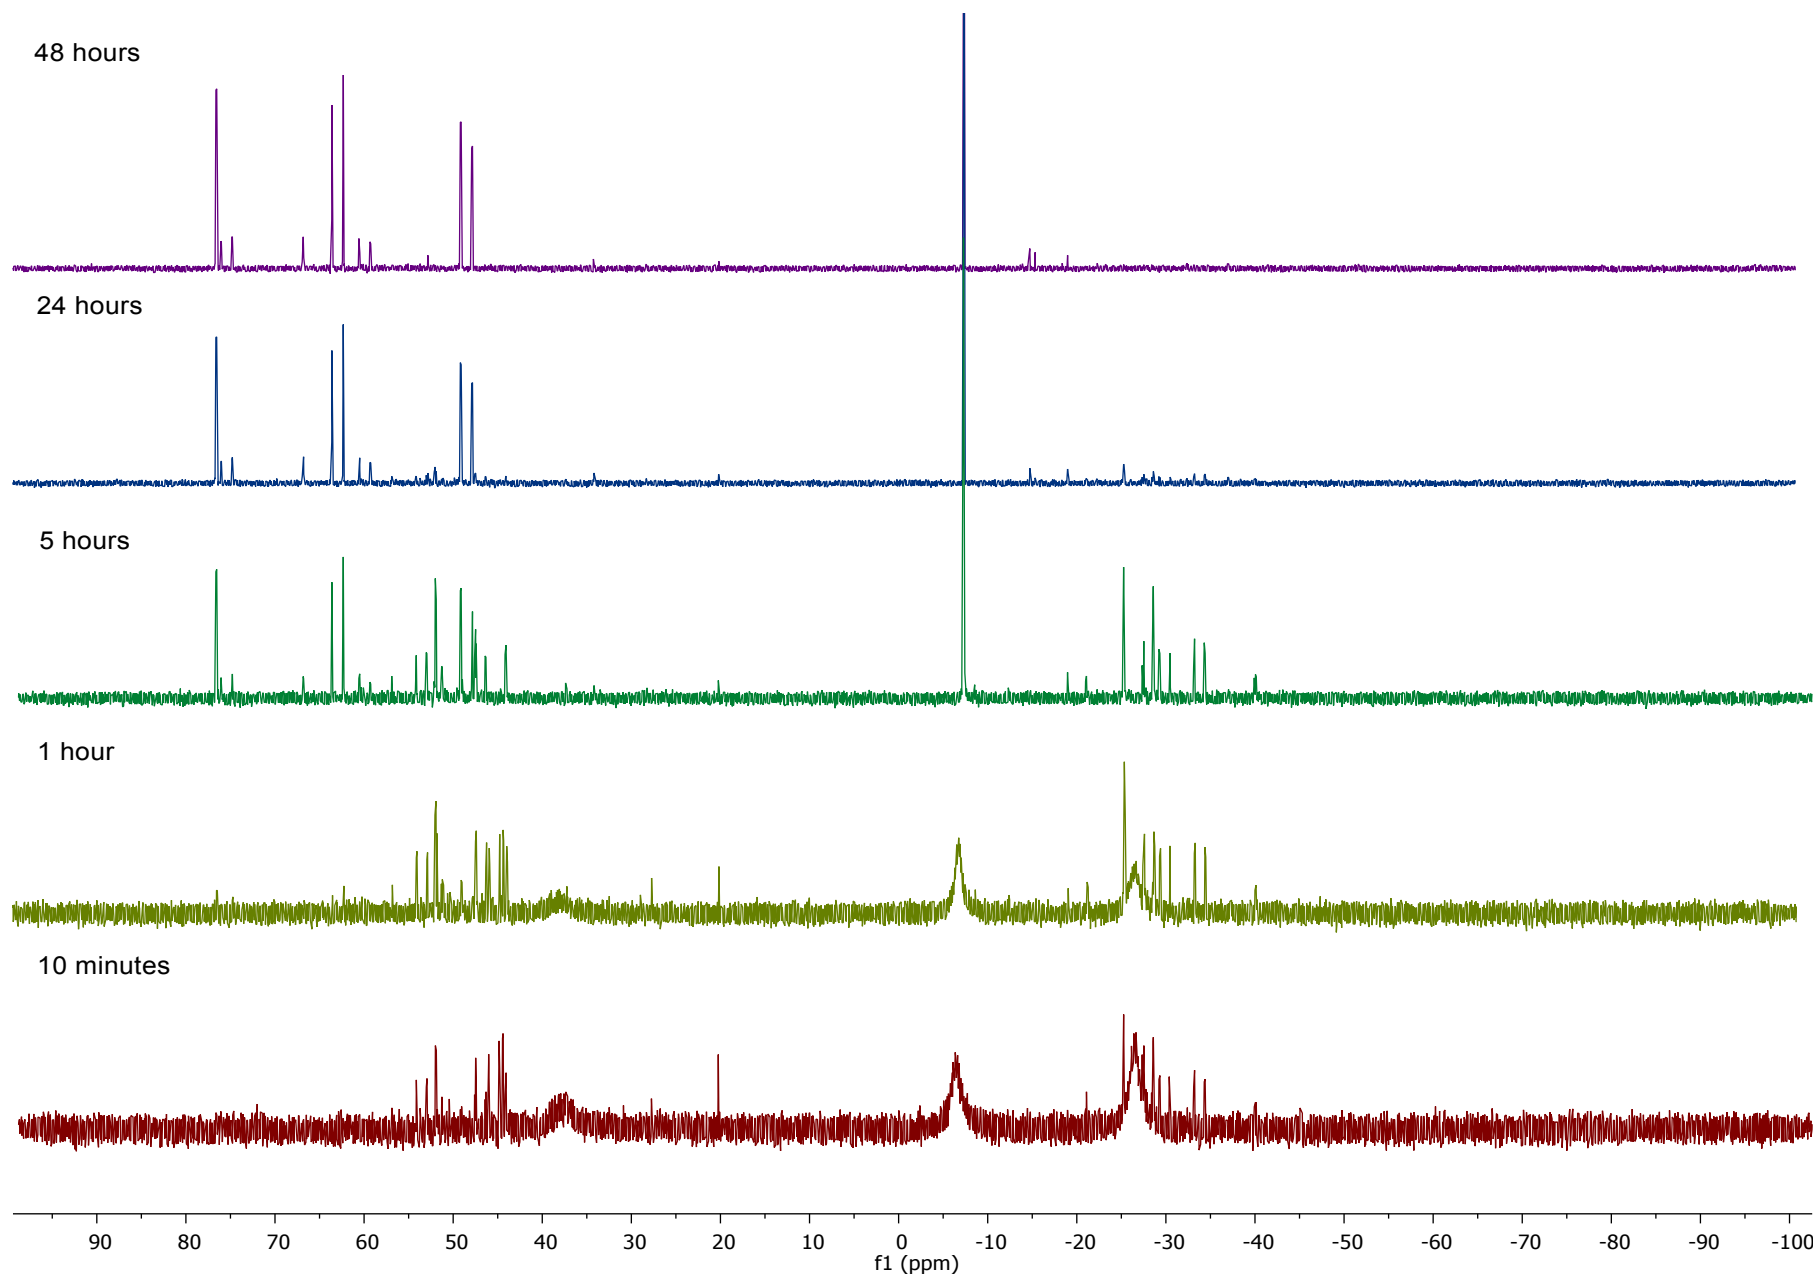

**Fig. S10.**  $^{31}\text{P}\{^1\text{H}\}$  NMR spectra (202 MHz,  $\text{THF-}d_8$ , 298 K) demonstrating the progress of the reaction between  $[\text{Ru}(\text{PPh}_3)_3\text{Cl}_2]\cdot\text{PPh}_3$  and  $\text{ZnMe}_2$  at 298 K.

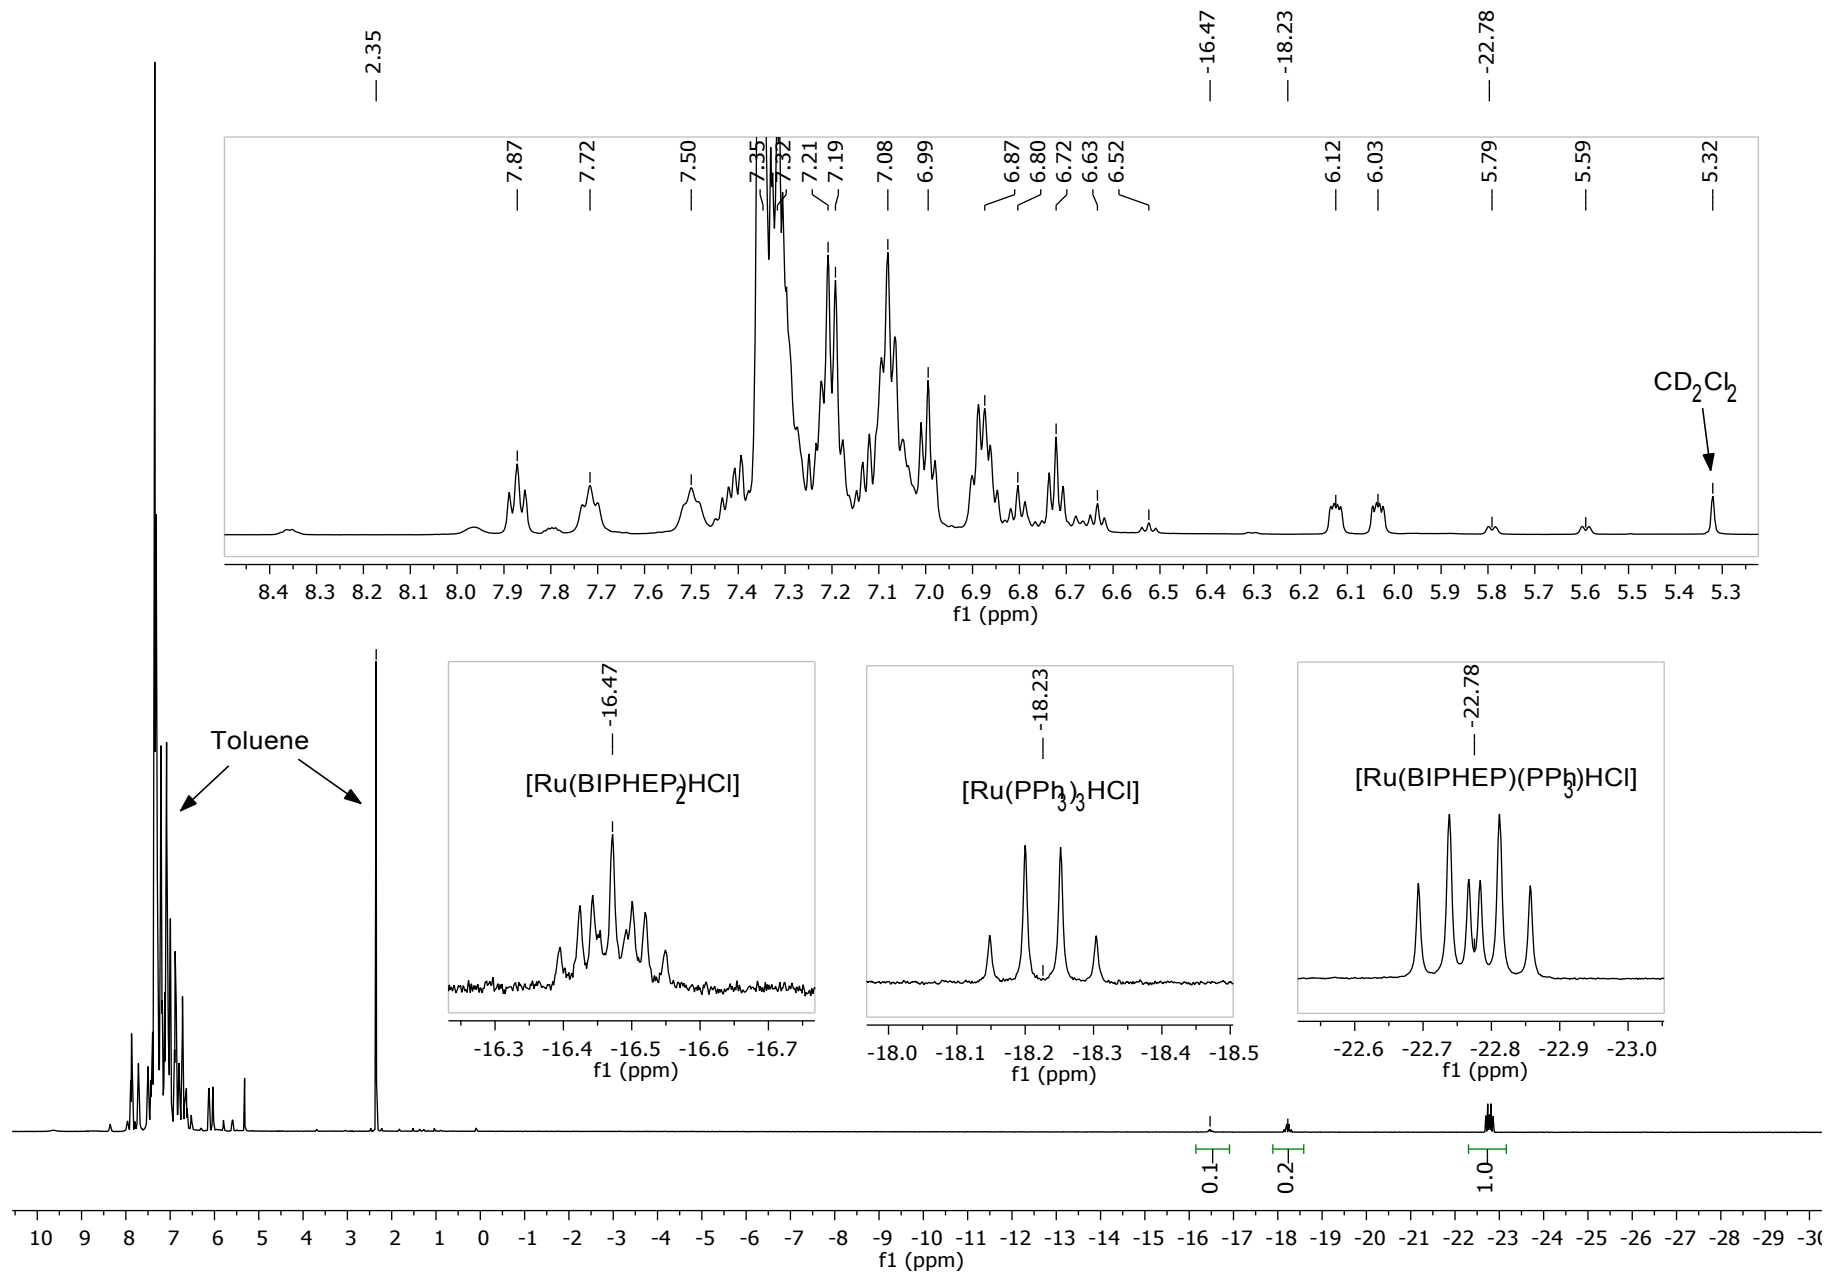

**Fig. S11.**  $^1\text{H}$  NMR spectrum (500 MHz,  $\text{CD}_2\text{Cl}_2$ , 298 K) of  $[\text{Ru}(\text{BIPHEP})(\text{PPh}_3)\text{HCl}]$  formed *in-situ* from reaction of  $[\text{Ru}(\text{PPh}_3)_3\text{HCl}]$  and BIPHEP.

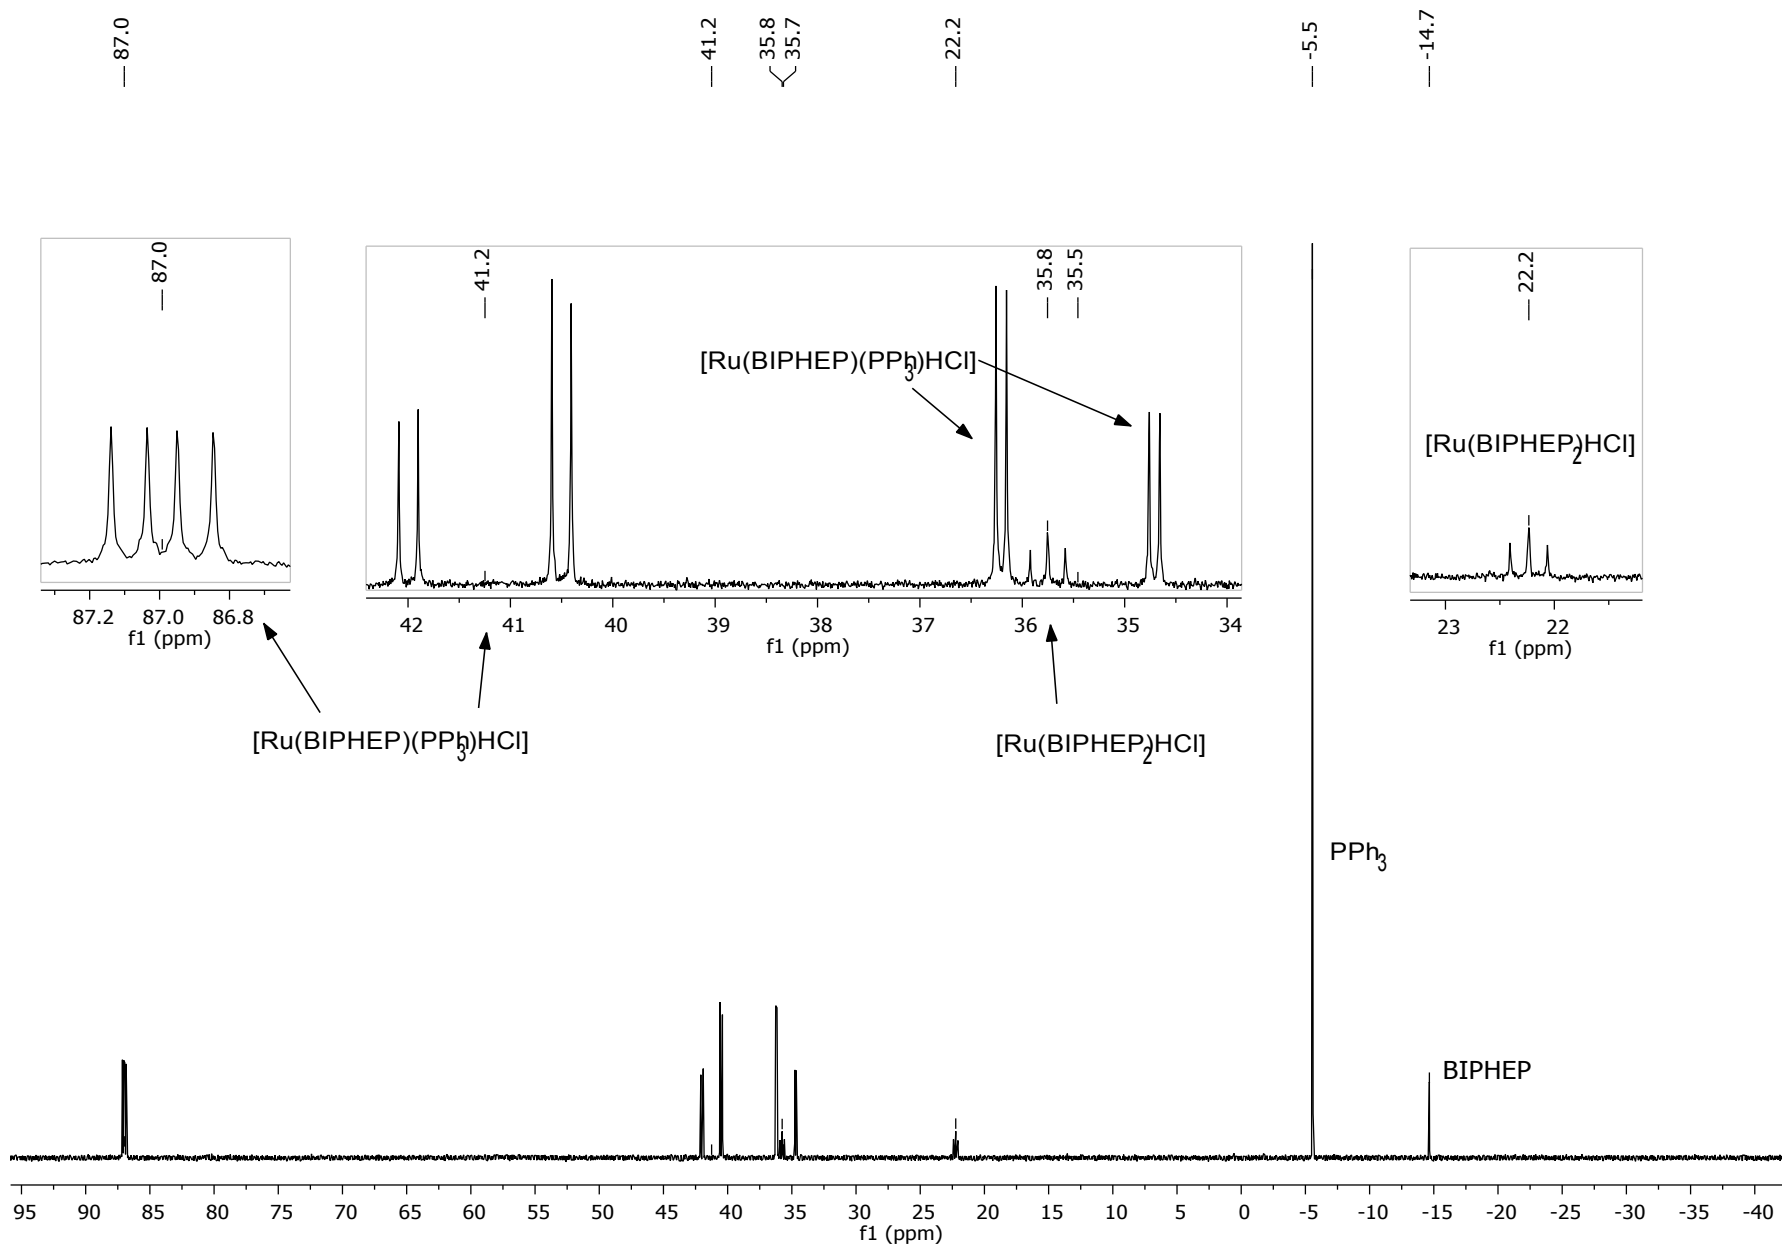

**Fig. S12.**  $^{31}\text{P}\{^1\text{H}\}$  NMR spectrum (202 MHz,  $\text{CD}_2\text{Cl}_2$ ) of  $[\text{Ru}(\text{BIPHEP})(\text{PPh}_3)\text{HCl}]$  formed *in-situ* in the reaction of  $[\text{Ru}(\text{PPh}_3)_3\text{HCl}]$  and BIPHEP.

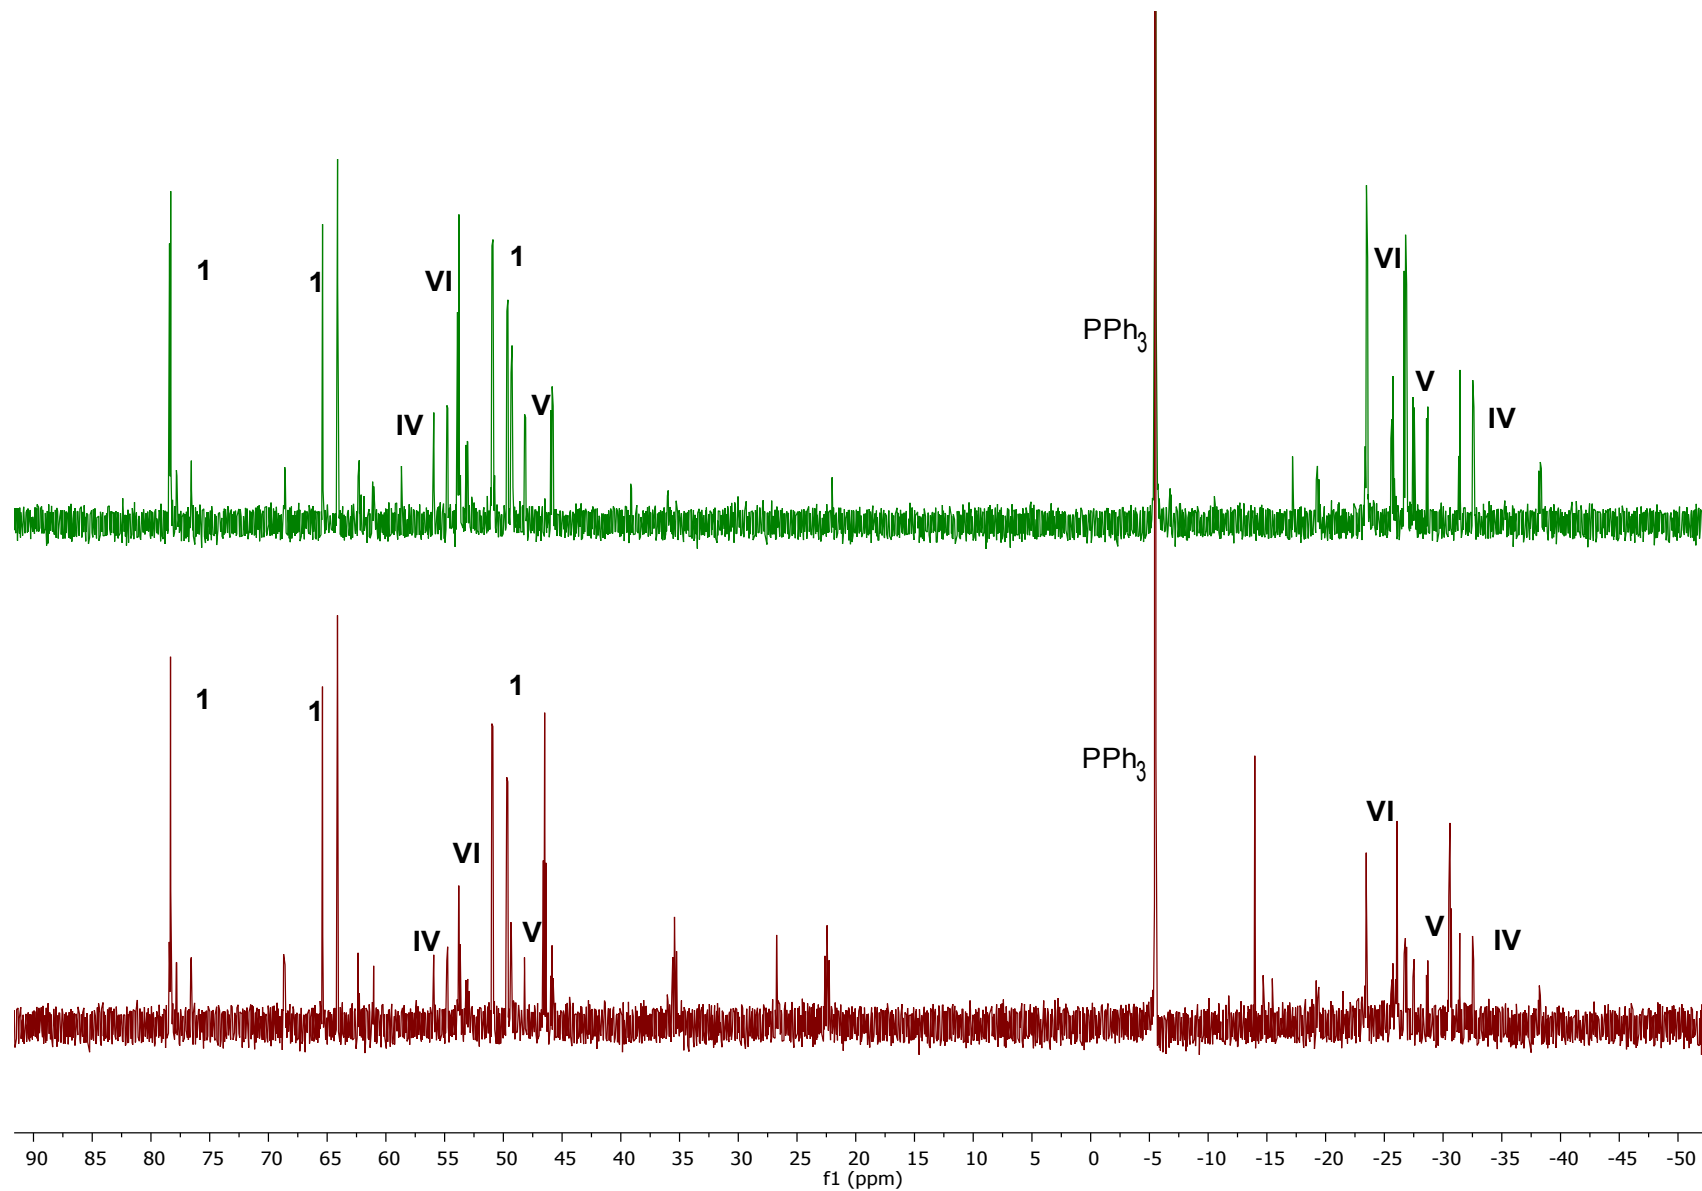

**Fig. S13.** Overlaid  $^{31}\text{P}\{^1\text{H}\}$  NMR spectra (202 MHz, THF- $d_8$ , 298 K) showing the reaction of  $[\text{Ru}(\text{PPh}_3)_3\text{Cl}_2]\cdot\text{PPh}_3$  and  $\text{ZnMe}_2$  after 5 h (top), and reaction of  $[\text{Ru}(\text{BIPHEP})(\text{PPh}_3)\text{HCl}]$  and  $\text{ZnMe}_2$  (bottom). The spectra highlight the formation of late intermediates **IV-VI** and final product **1** in both reactions.

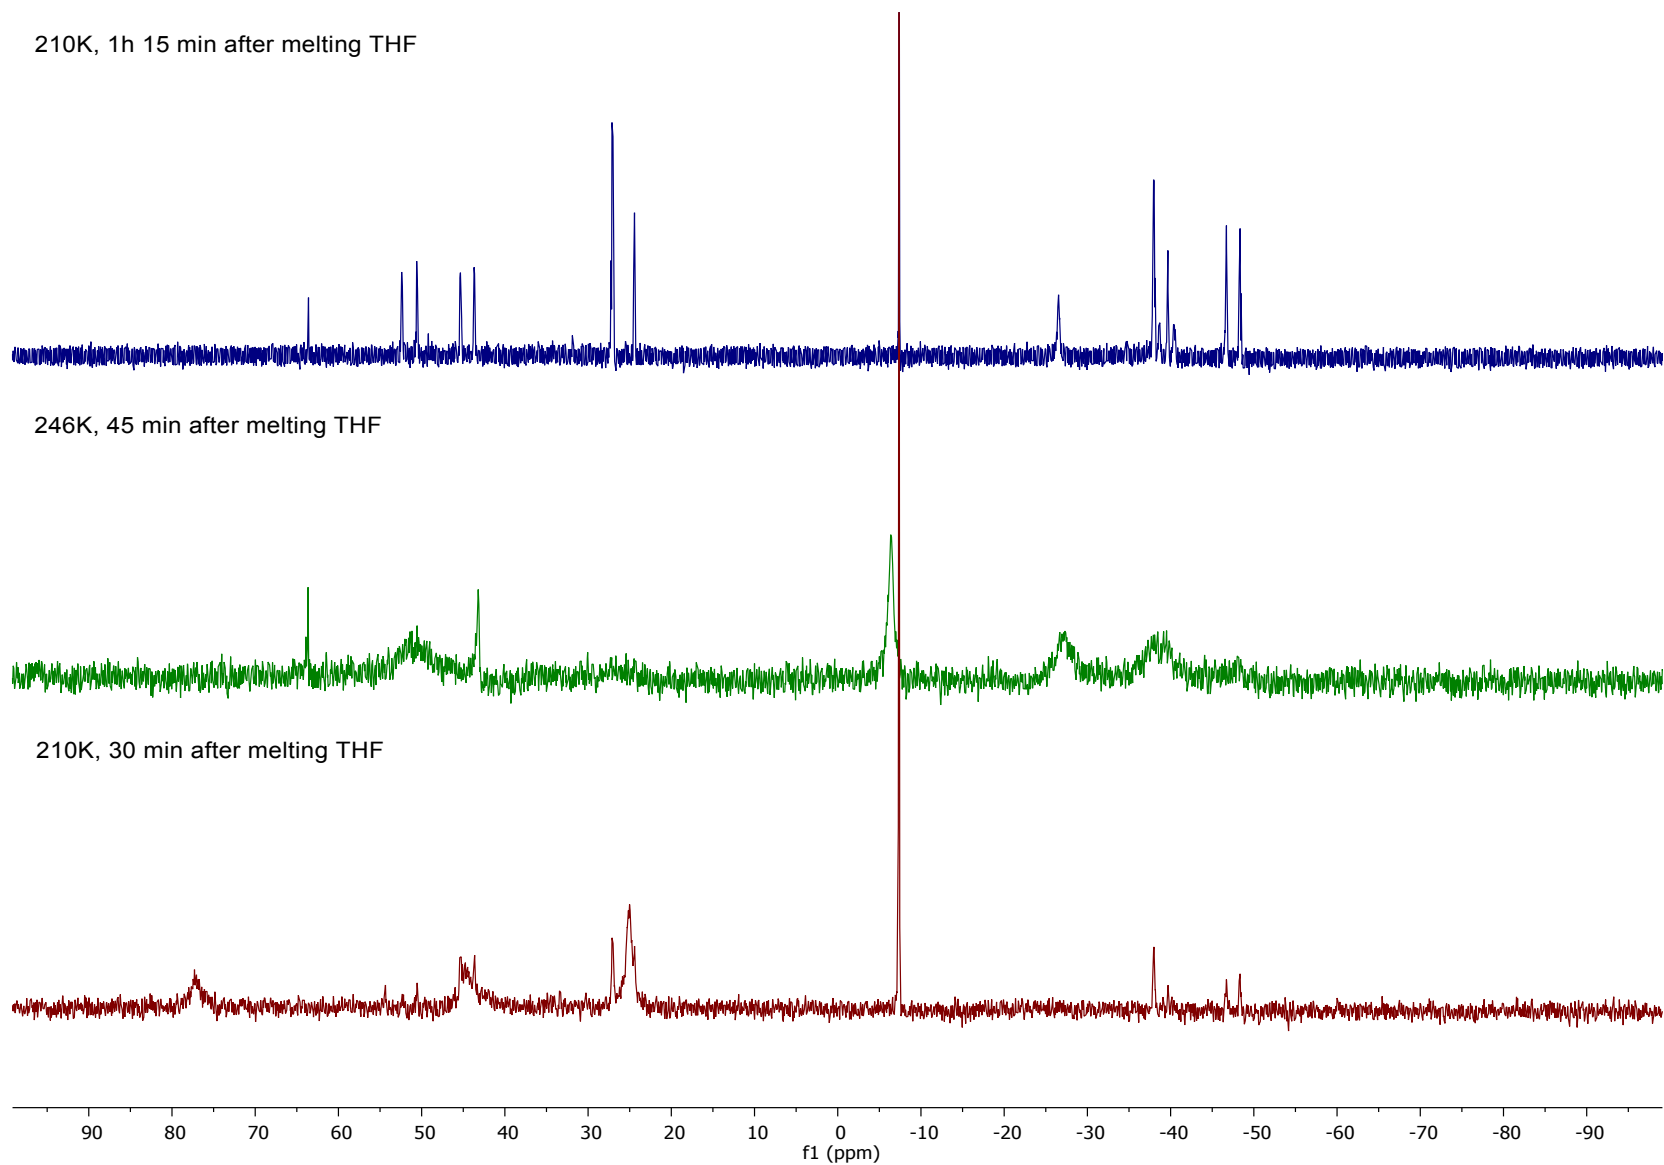

**Fig. S14.** VT  $^{31}\text{P}\{^1\text{H}\}$  NMR spectra (162 MHz,  $\text{THF-}d_8$ ) of the reaction of  $[\text{Ru}(\text{PPh}_3)_3\text{Cl}_2]\cdot\text{PPh}_3$  and  $\text{ZnMe}_2$ , demonstrating the formation of early intermediates (I-III).

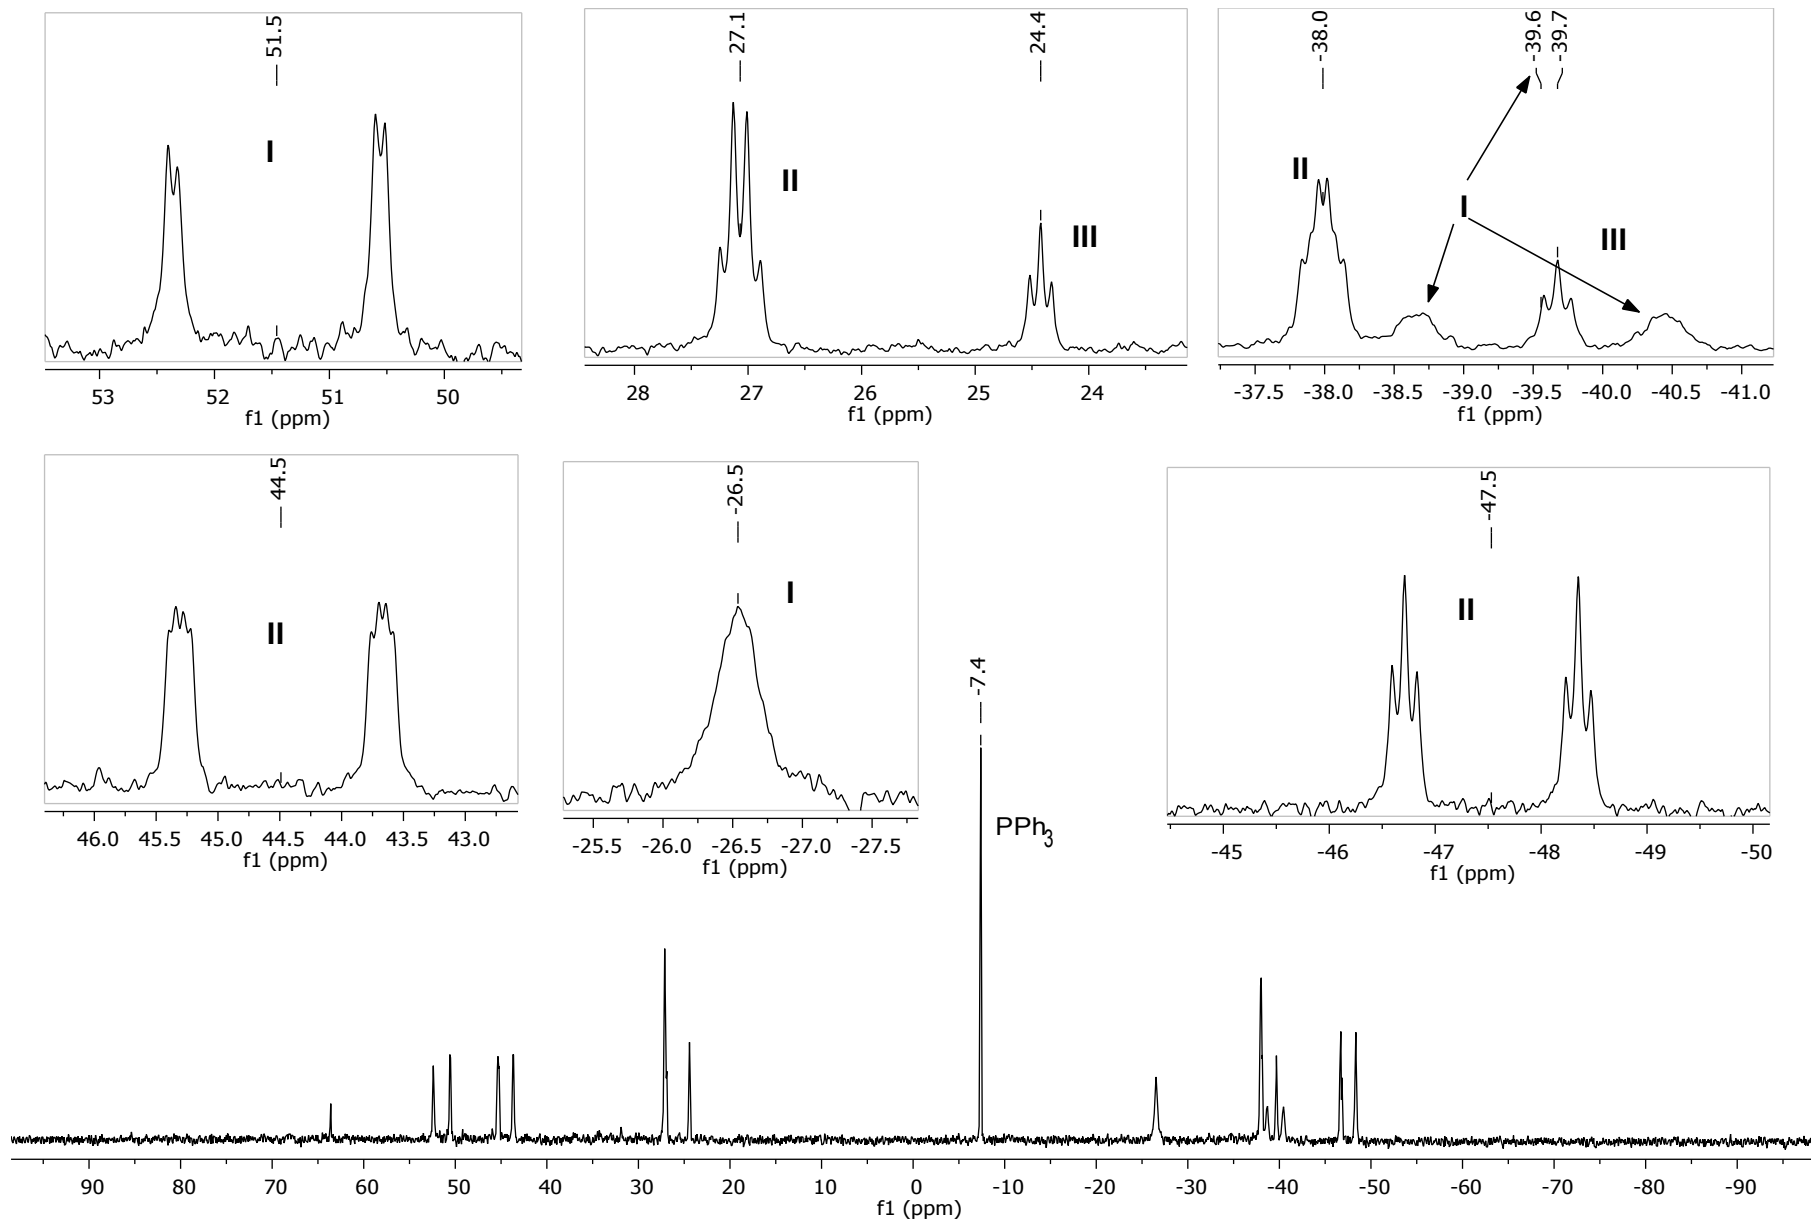

**Fig. S15.**  $^{31}\text{P}\{^1\text{H}\}$  NMR spectrum (162 MHz,  $\text{THF-d}_8$ , 210 K) of reaction of  $[\text{Ru}(\text{PPh}_3)_3\text{Cl}_2]\cdot\text{PPh}_3$  and  $\text{ZnMe}_2$  at 246 K showing early intermediates **I-III**.

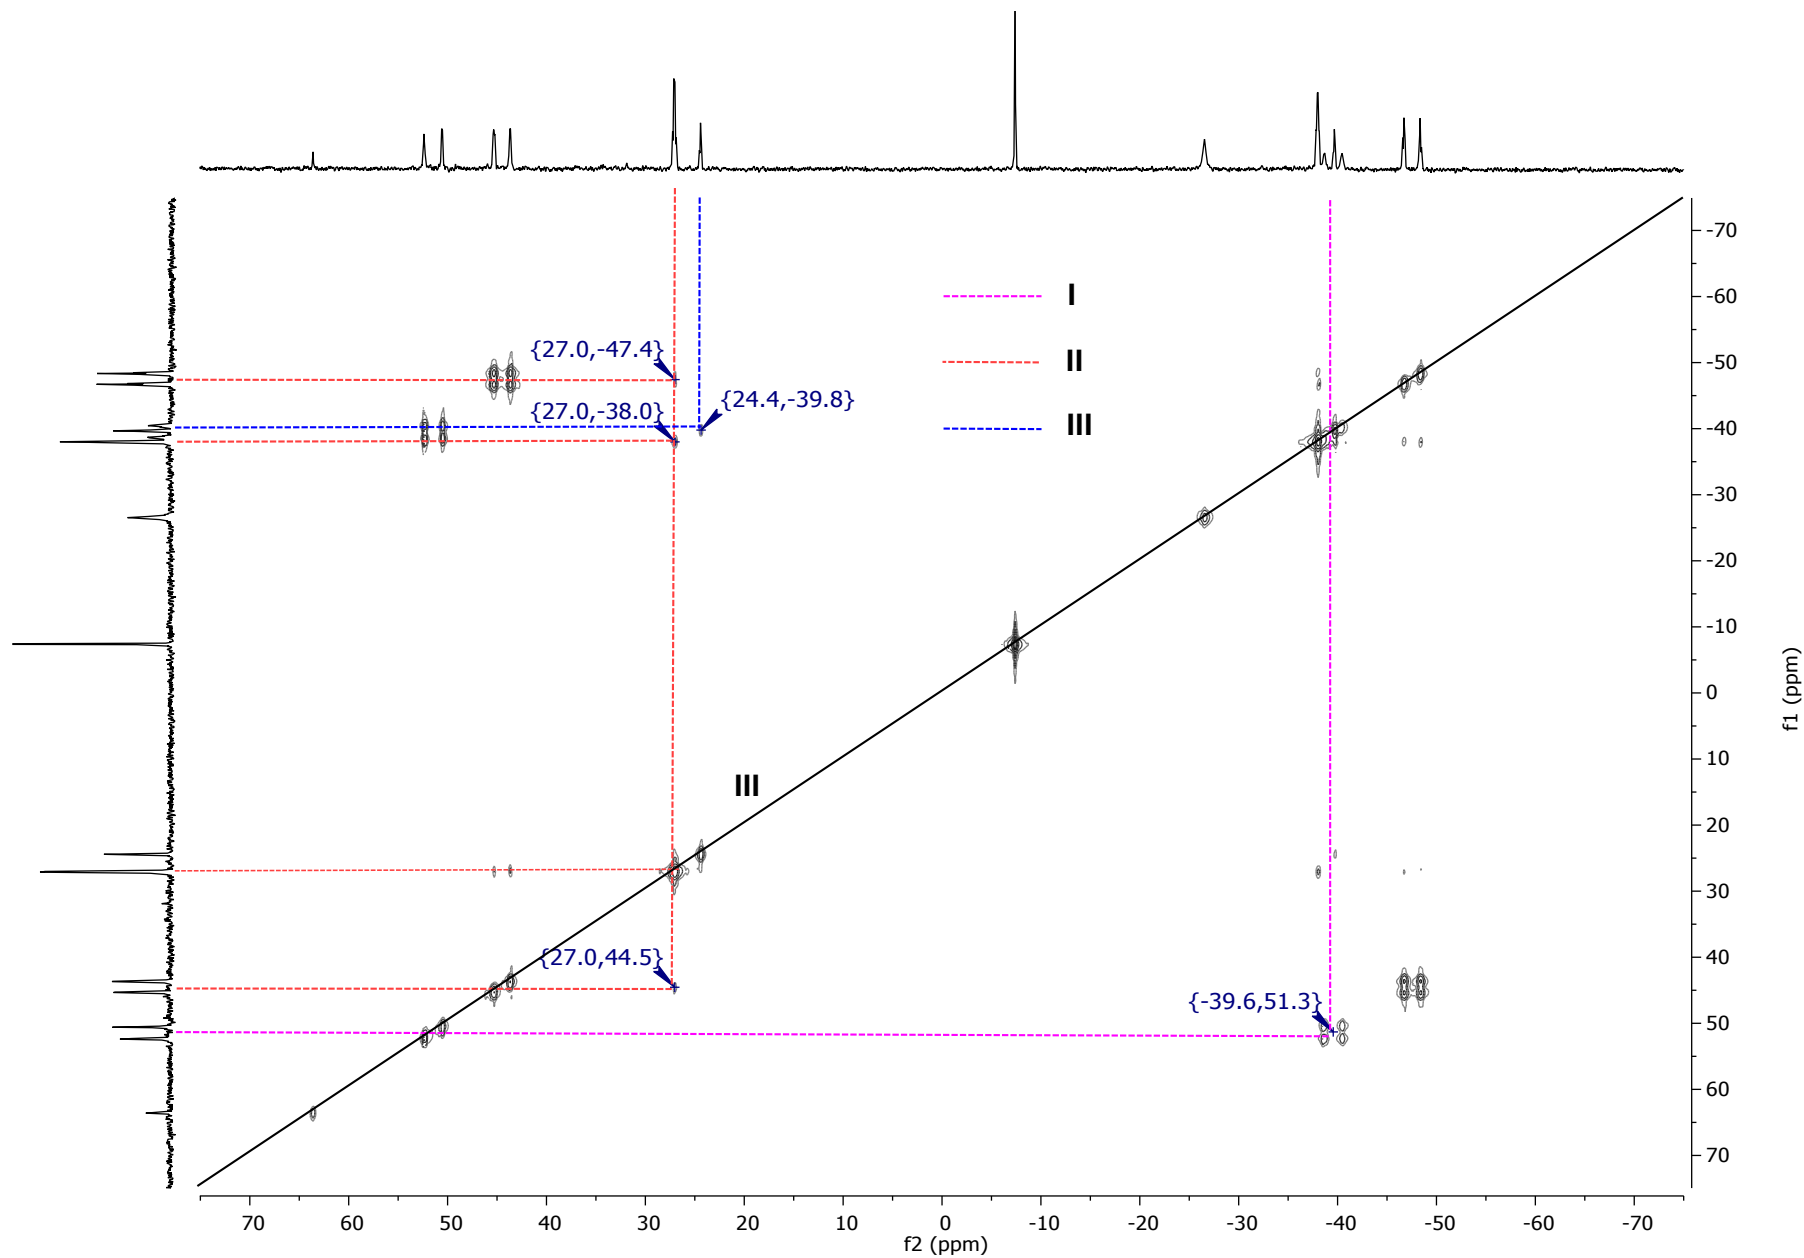

**Fig. S16.**  $^{31}\text{P}\{^1\text{H}\}$  COSY (162 MHz,  $\text{THF-}d_8$ , 210 K) of reaction of  $[\text{Ru}(\text{PPh}_3)_3\text{Cl}_2] \cdot \text{PPh}_3$  and  $\text{ZnMe}_2$  at 246 K showing early intermediates **I-III**.



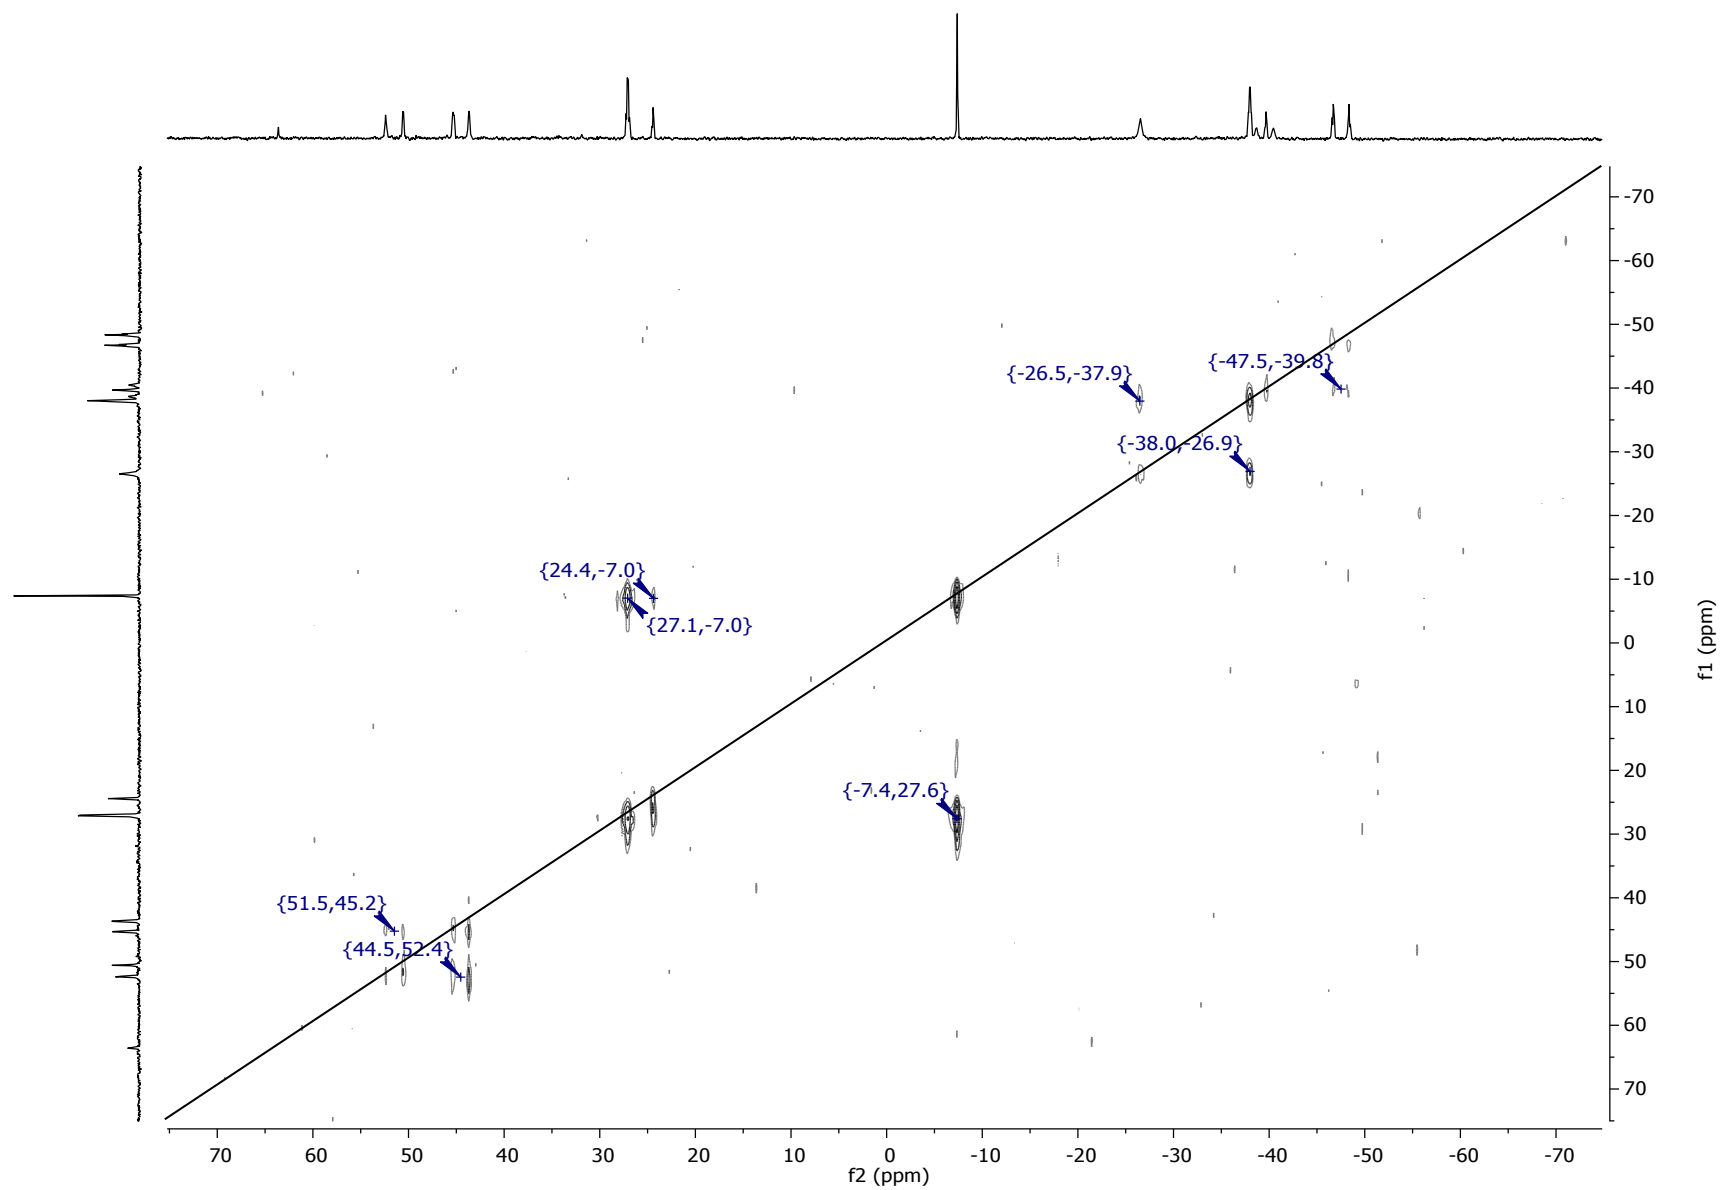

**Fig. S17.**  $^{31}\text{P}\{^1\text{H}\}$  EXSY (162 MHz,  $\text{THF-}d_8$ , 210 K) of the reaction of  $[\text{Ru}(\text{PPh}_3)_3\text{Cl}_2]\cdot\text{PPh}_3$  and  $\text{ZnMe}_2$  at 246 K showing early intermediates **I-III**

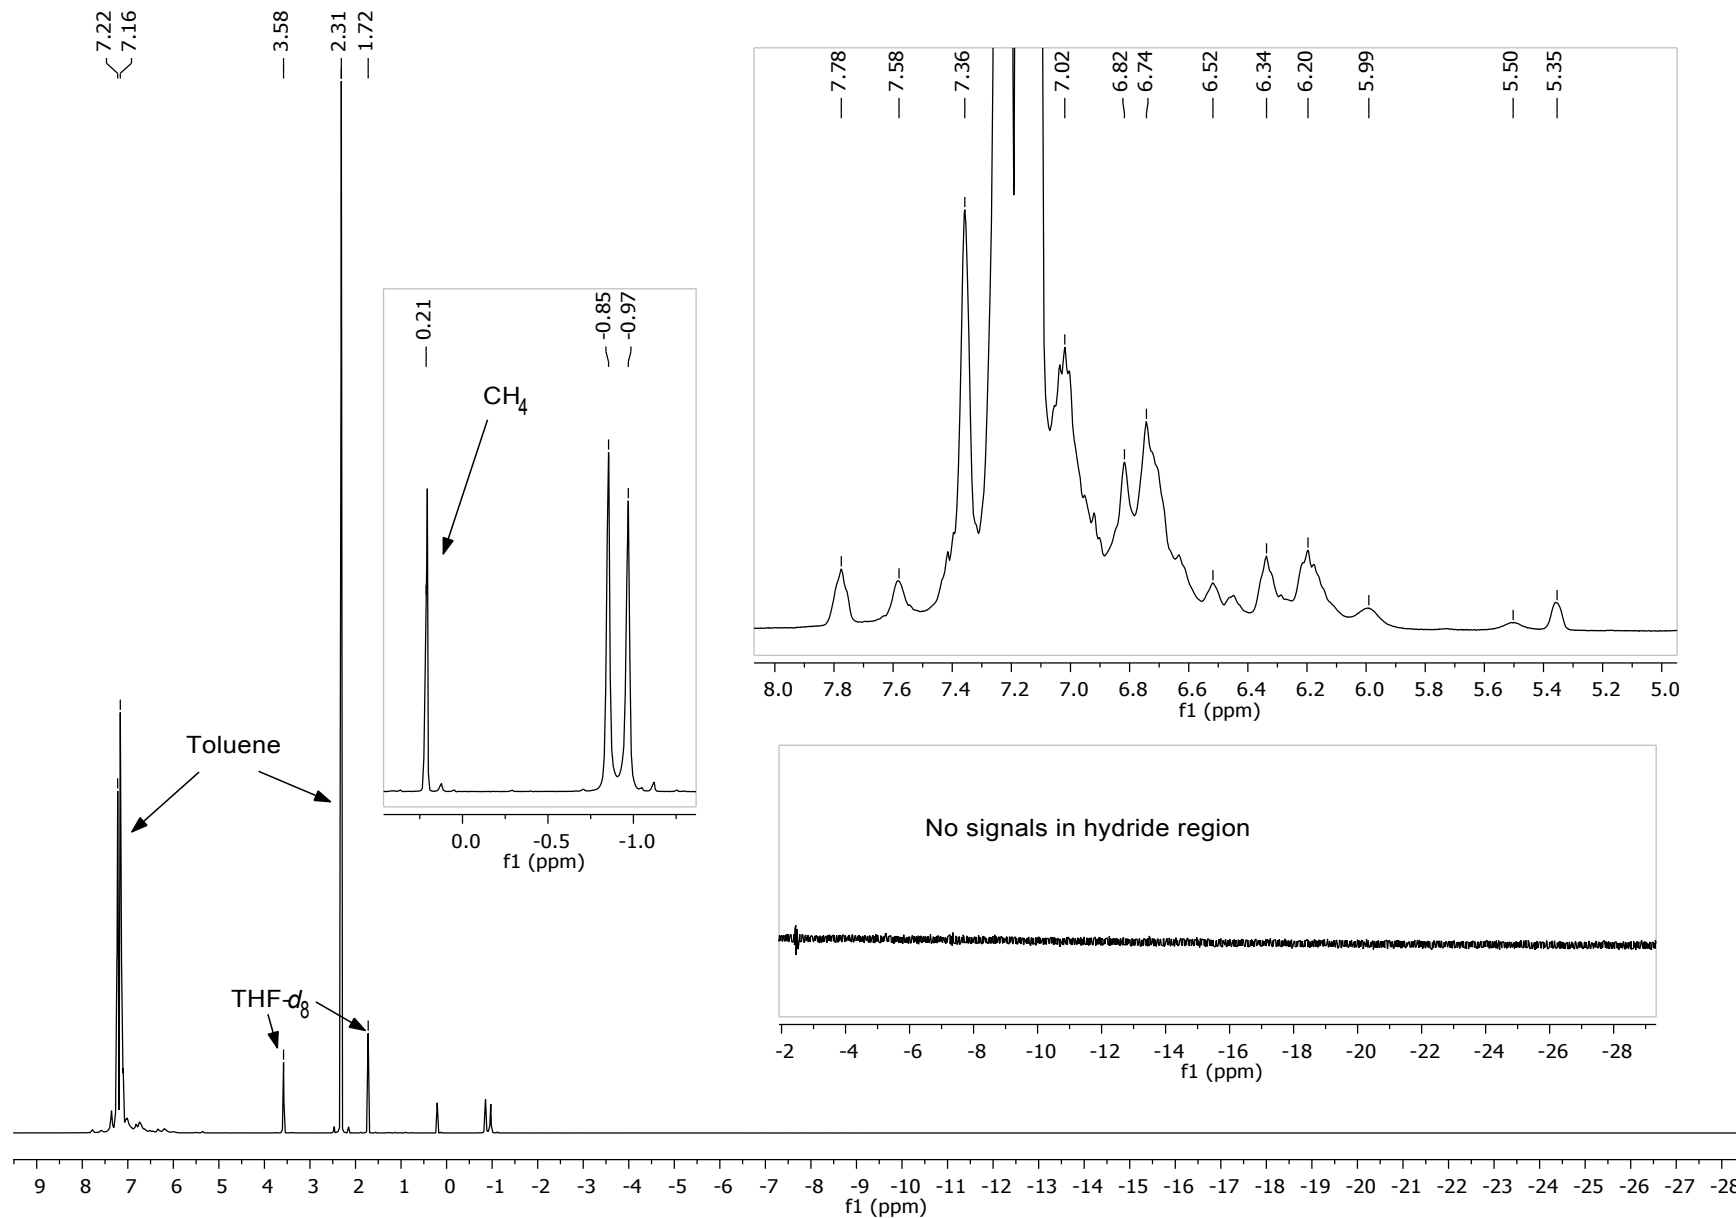

**Fig. S18.** <sup>1</sup>H NMR spectrum (400 MHz, THF-*d*<sub>8</sub>, 210 K) of the reaction of [Ru(PPh<sub>3</sub>)<sub>3</sub>Cl<sub>2</sub>]·PPh<sub>3</sub> and ZnMe<sub>2</sub> at 246 K showing early intermediates **I-III**.

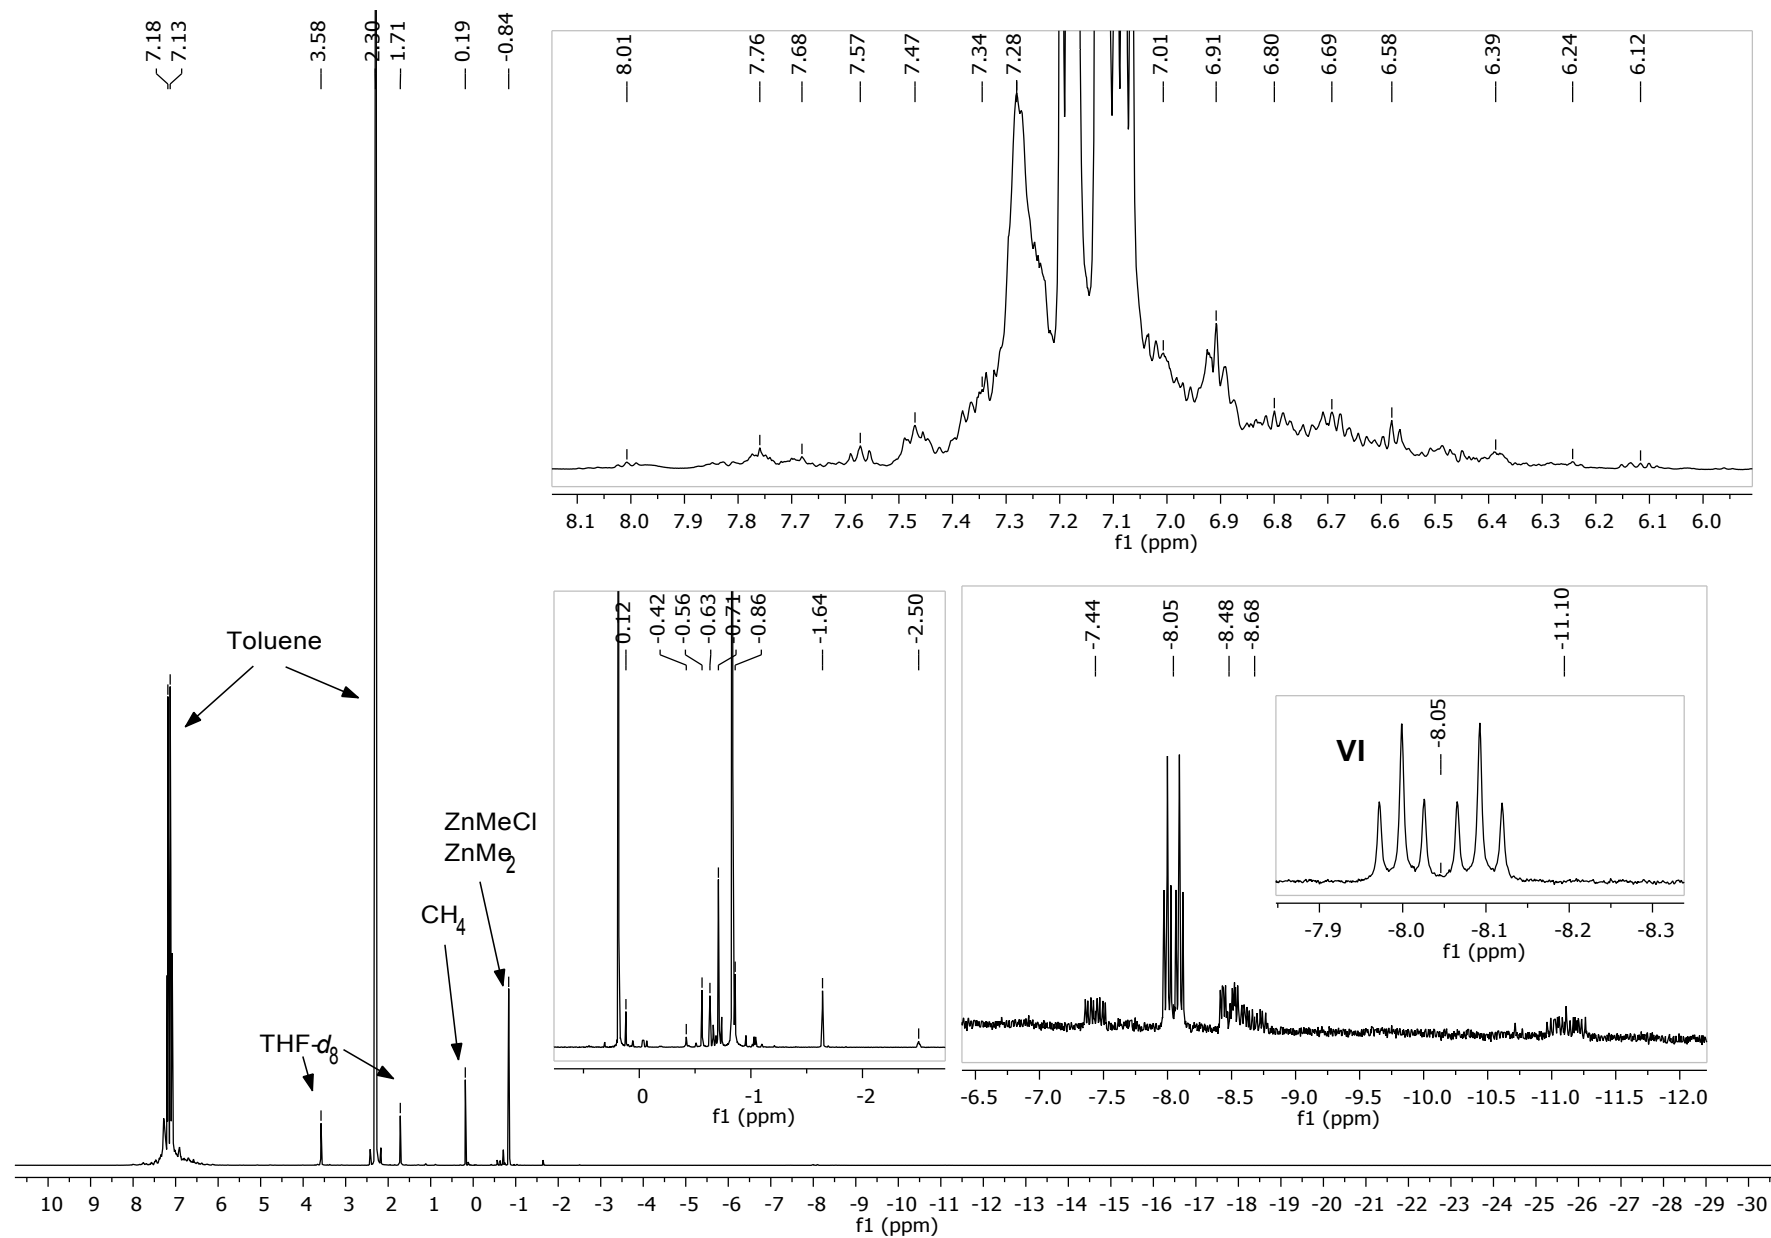

**Fig. S19.**  $^1\text{H}$  NMR spectrum (500 MHz,  $\text{THF-d}_8$ , 298 K) of the reaction of  $[\text{Ru}(\text{PPh}_3)_3\text{Cl}_2]\cdot\text{PPh}_3$  and  $\text{ZnMe}_2$  (3.5 h, 298 K) showing late intermediates **IV-VI**.

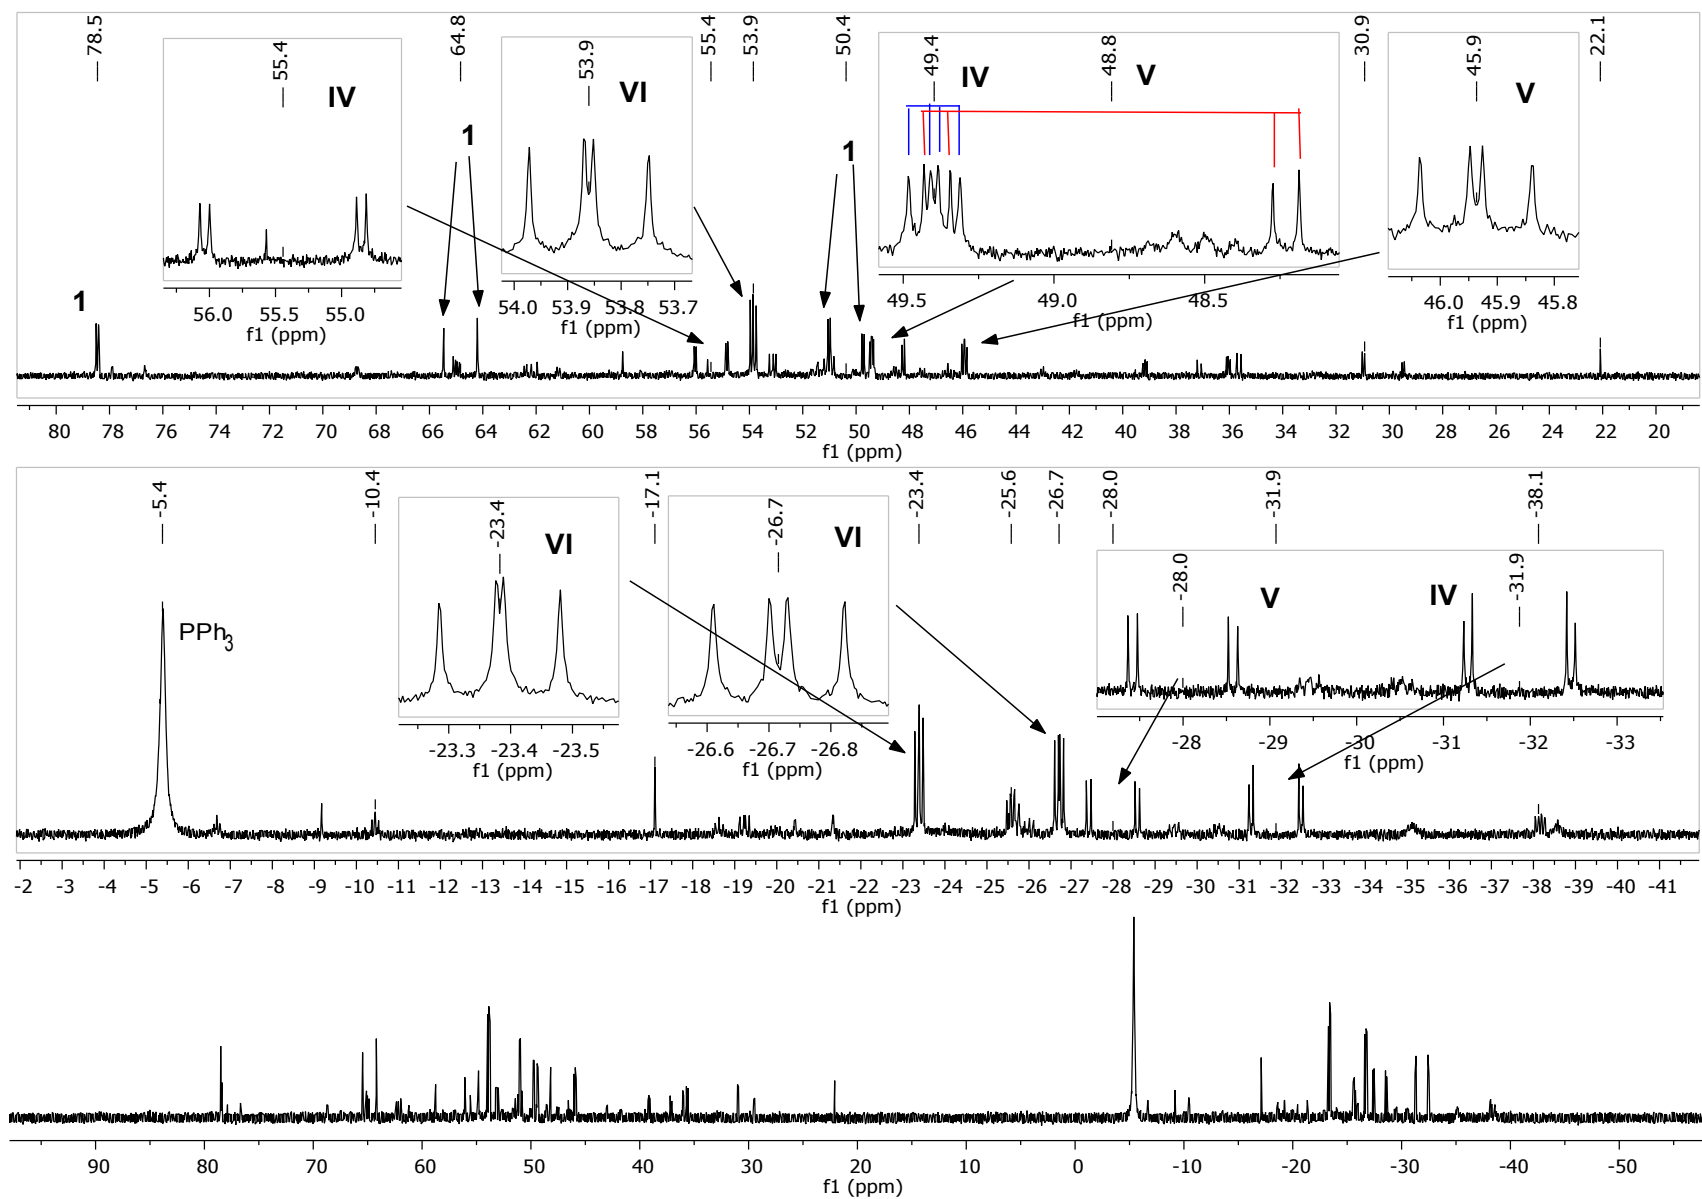

**Fig. S20.**  $^{31}\text{P}\{^1\text{H}\}$  NMR spectrum (202 MHz,  $\text{THF-}d_8$ , 298 K) of the reaction of  $[\text{Ru}(\text{PPh}_3)_3\text{Cl}_2]\cdot\text{PPh}_3$  and  $\text{ZnMe}_2$  (4 h, 298 K) showing late intermediates IV-VI.

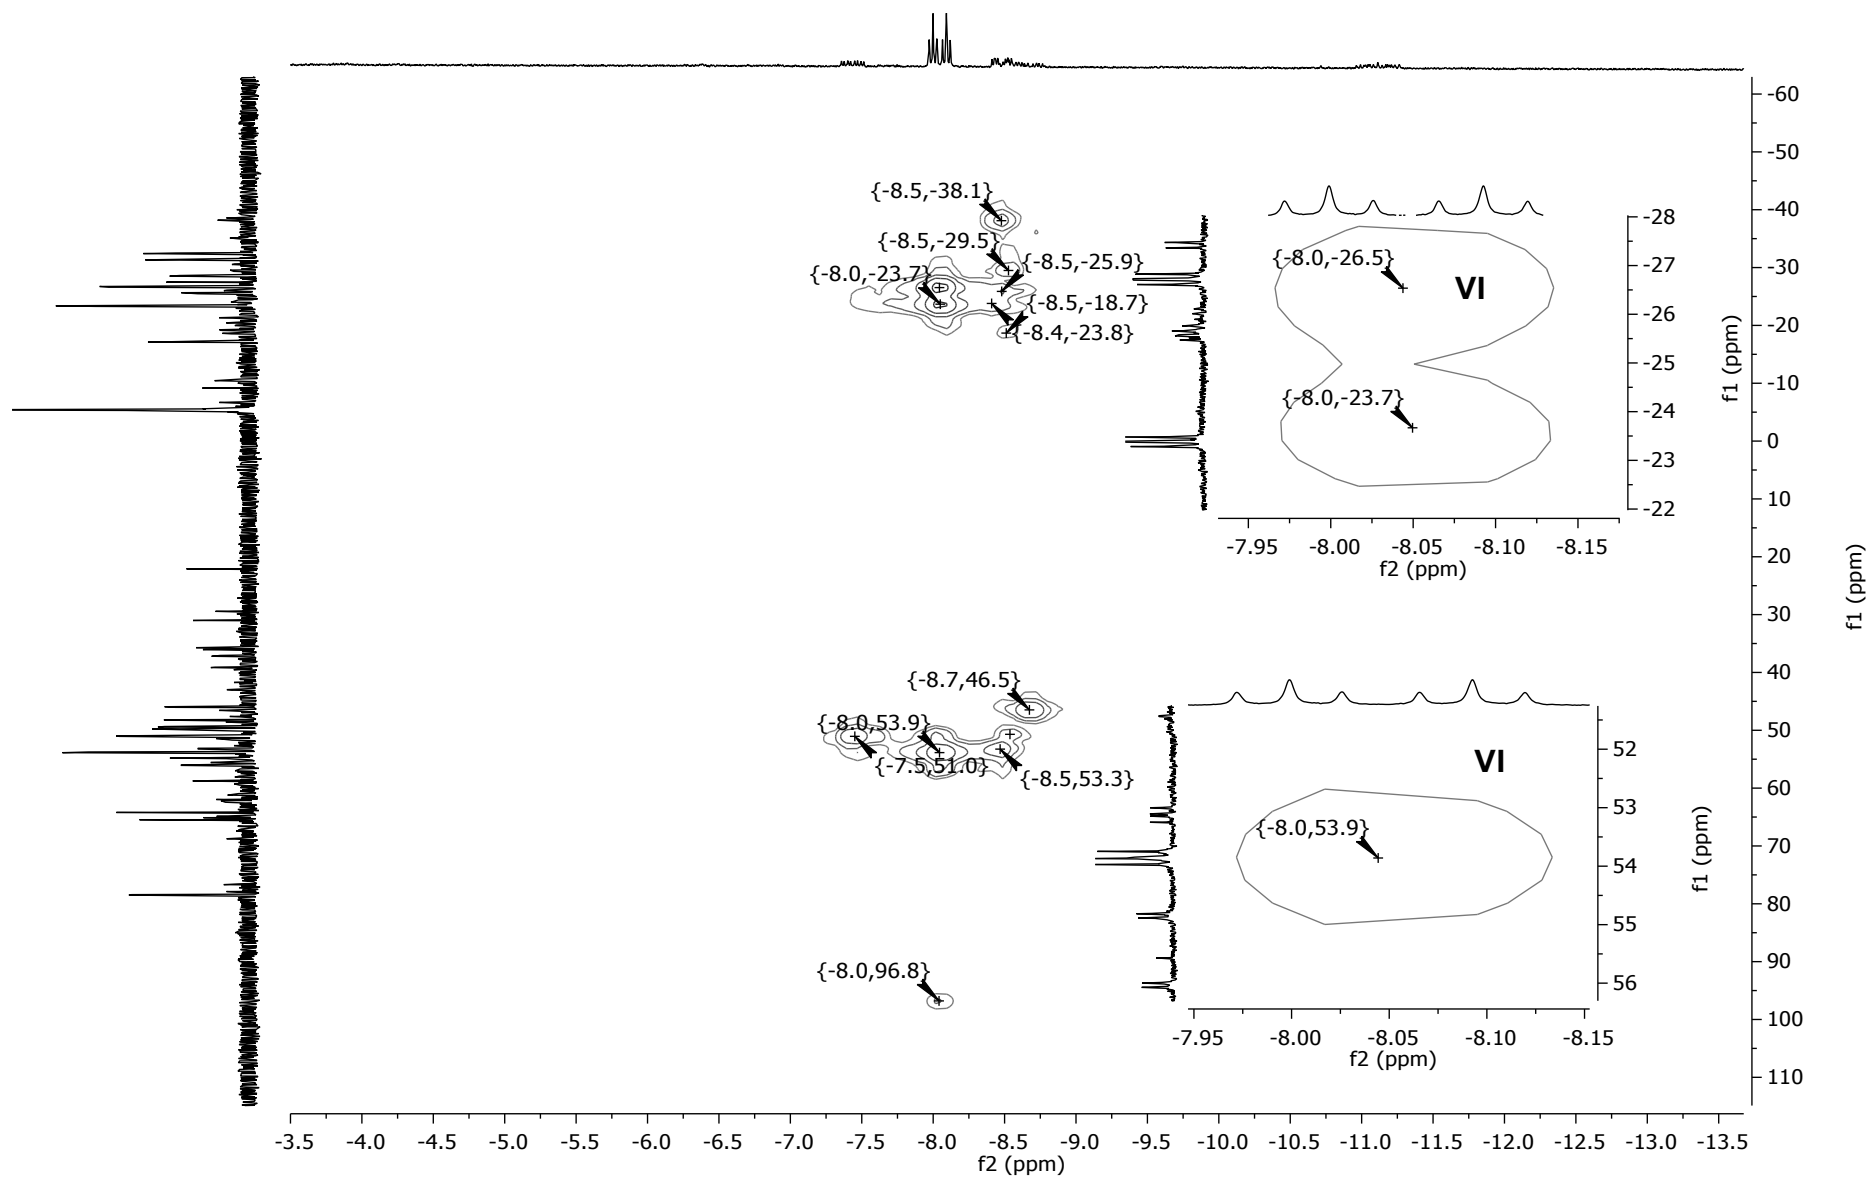

**Fig. S21.**  $^{31}\text{P}\{^1\text{H}\}$  HMQC (202 MHz, THF- $d_8$ , 298 K) of the reaction of  $[\text{Ru}(\text{PPh}_3)_3\text{Cl}_2]\cdot\text{PPh}_3$  and  $\text{ZnMe}_2$  after 5.5 h at 298 K showing late intermediates **IV-VI**.

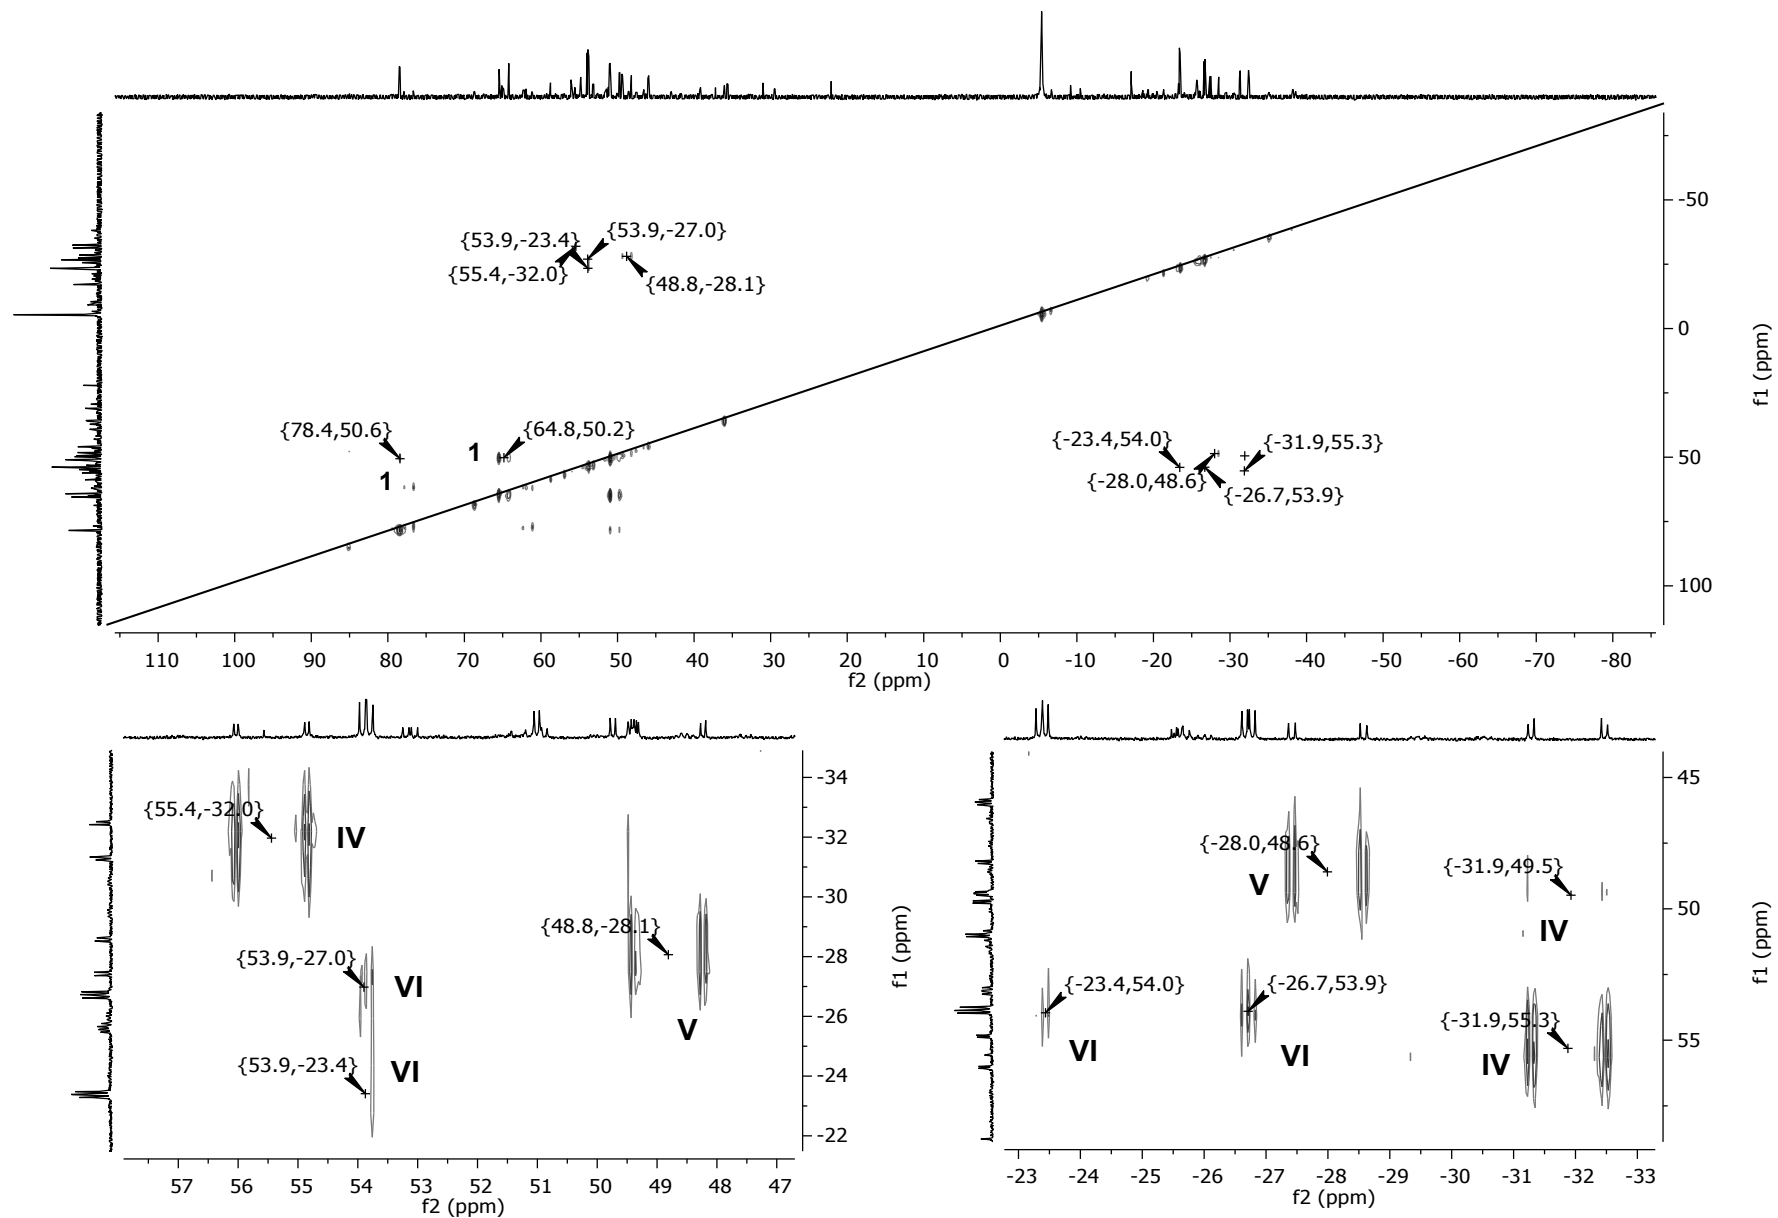

**Fig. S22.**  $^{31}\text{P}\{^1\text{H}\}$  COSY (202 MHz,  $\text{THF-}d_8$ , 298 K) of reaction of  $[\text{Ru}(\text{PPh}_3)_3\text{Cl}_2]\cdot\text{PPh}_3$  and  $\text{ZnMe}_2$  after 7 h at 298 K showing late intermediates IV-VI.

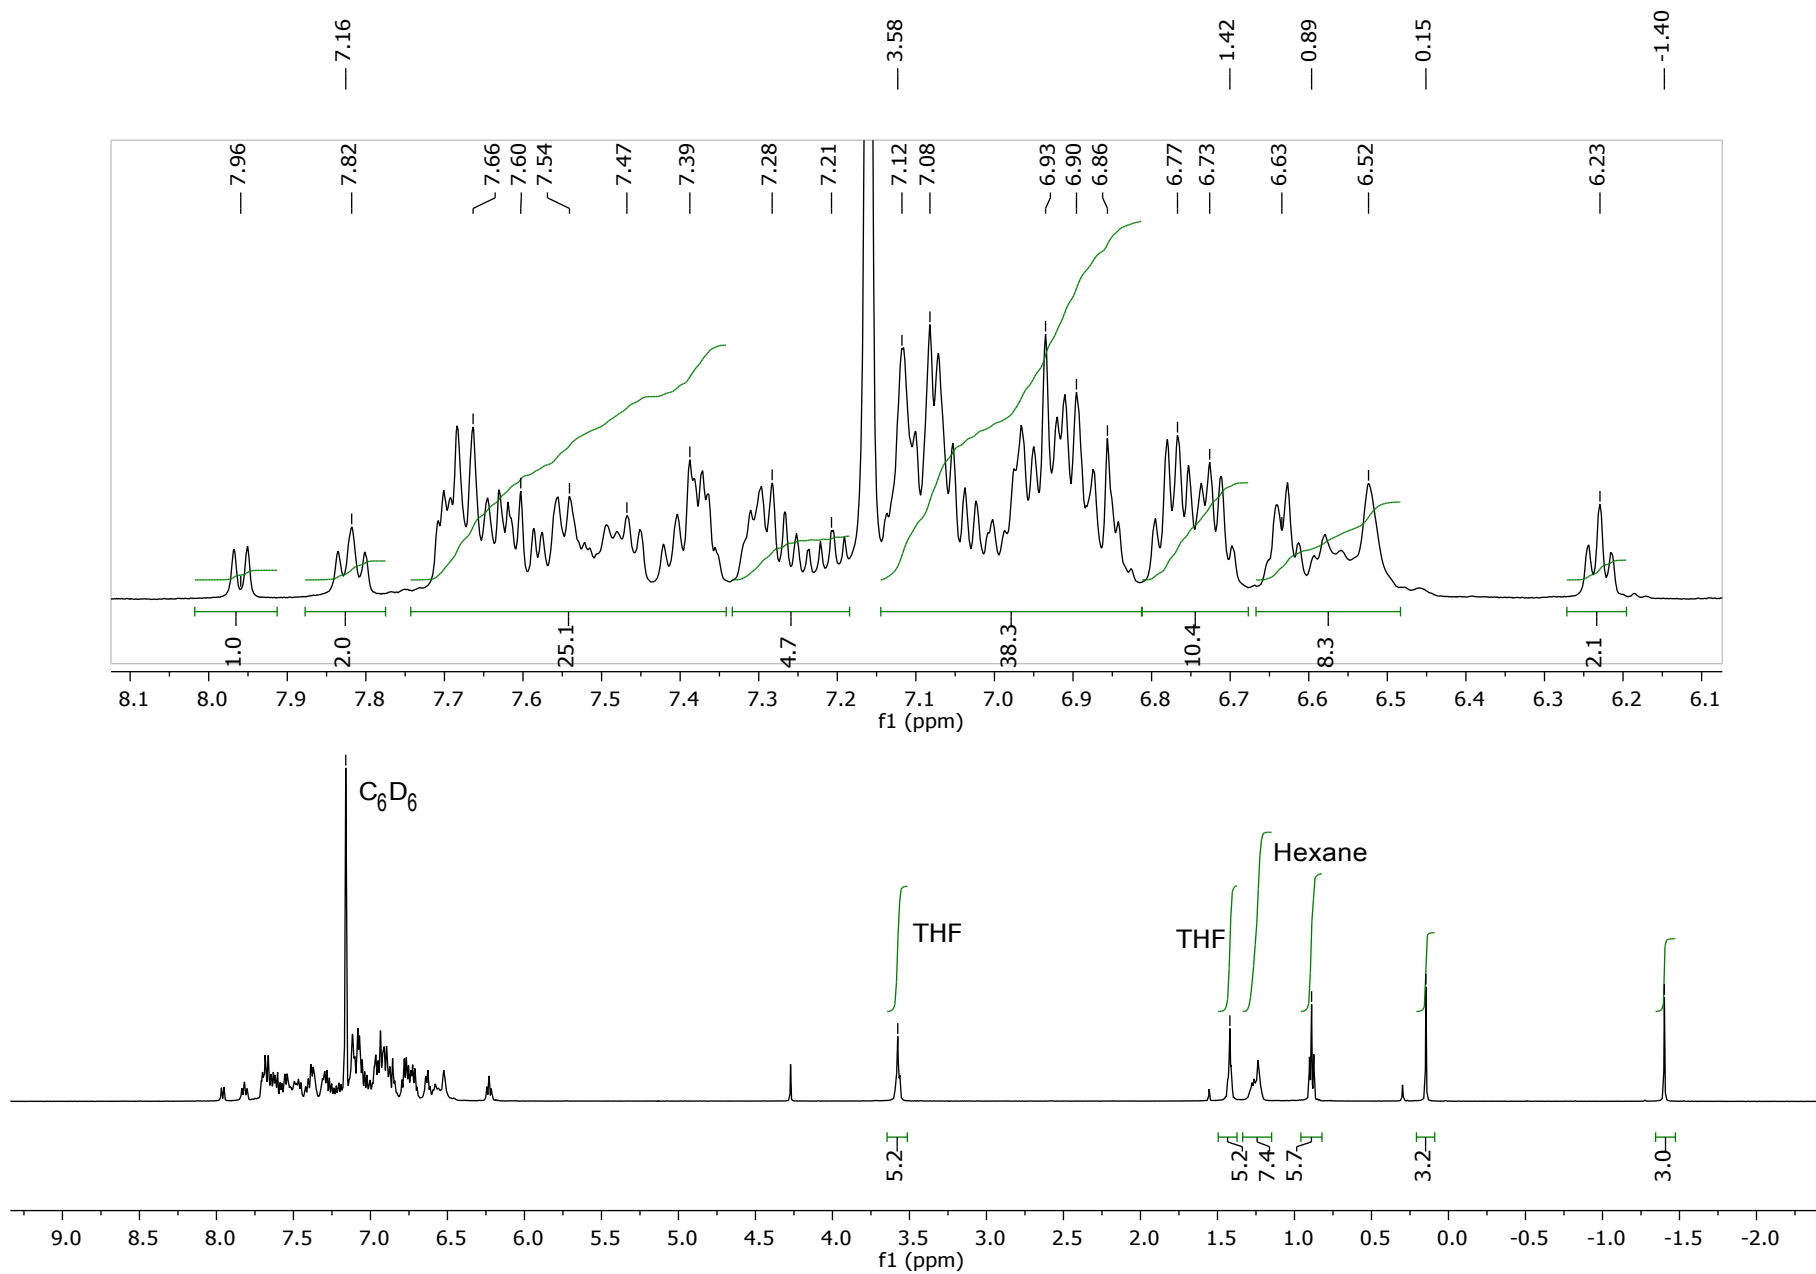

**Fig. S23.**  $^1\text{H}$  NMR spectrum (500 MHz,  $\text{C}_6\text{D}_6$ , 298 K) of  $[\text{Ru}(\text{dppbz})(\text{PPh}_2(\text{binaphthyl}))\text{ZnMe}]$  (**3**).

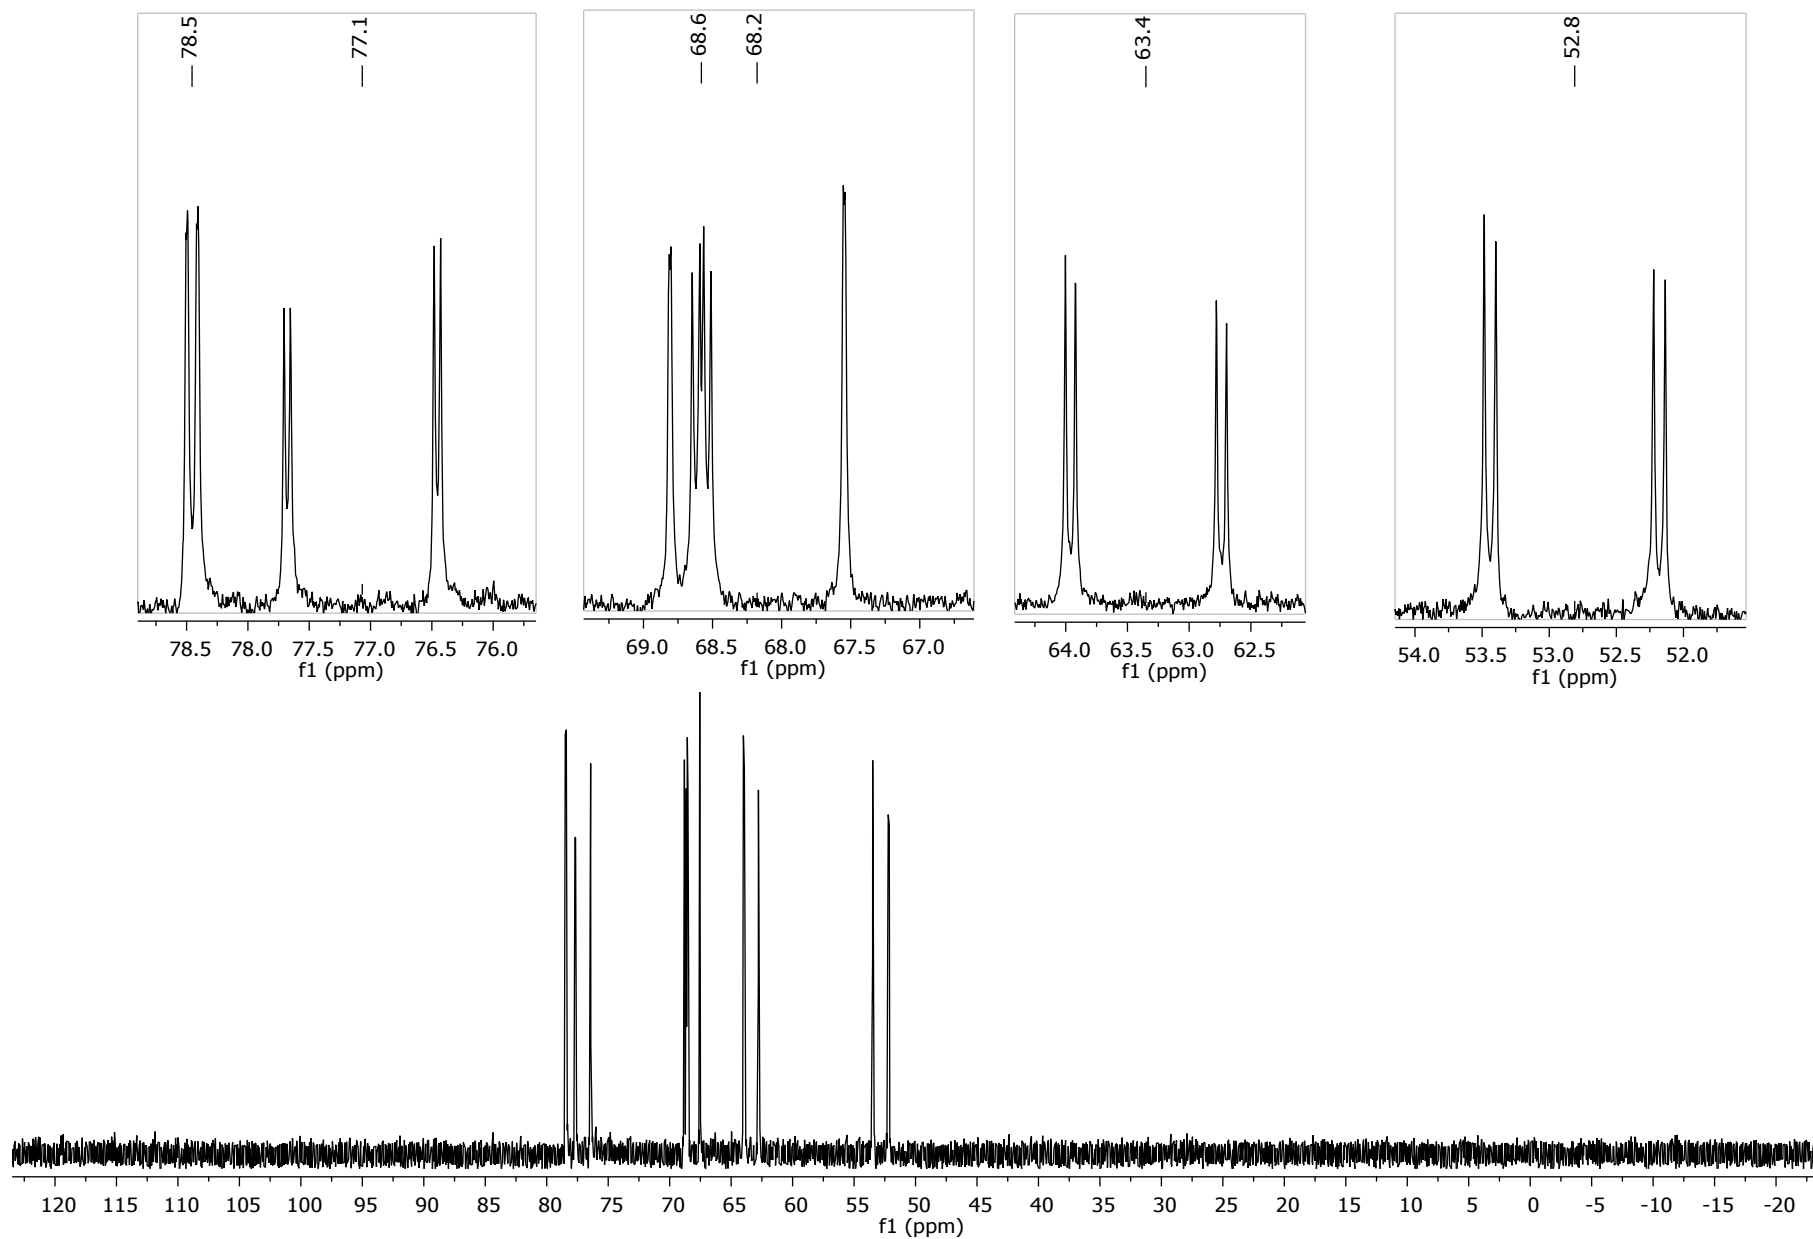

**Fig. S24.**  $^{31}\text{P}\{^1\text{H}\}$  NMR spectrum (202 MHz,  $\text{C}_6\text{D}_6$ , 298 K) of  $[\text{Ru}(\text{dppbz})(\text{PPh}_2(\text{binaphthyl})')\text{ZnMe}]$  (**3**).



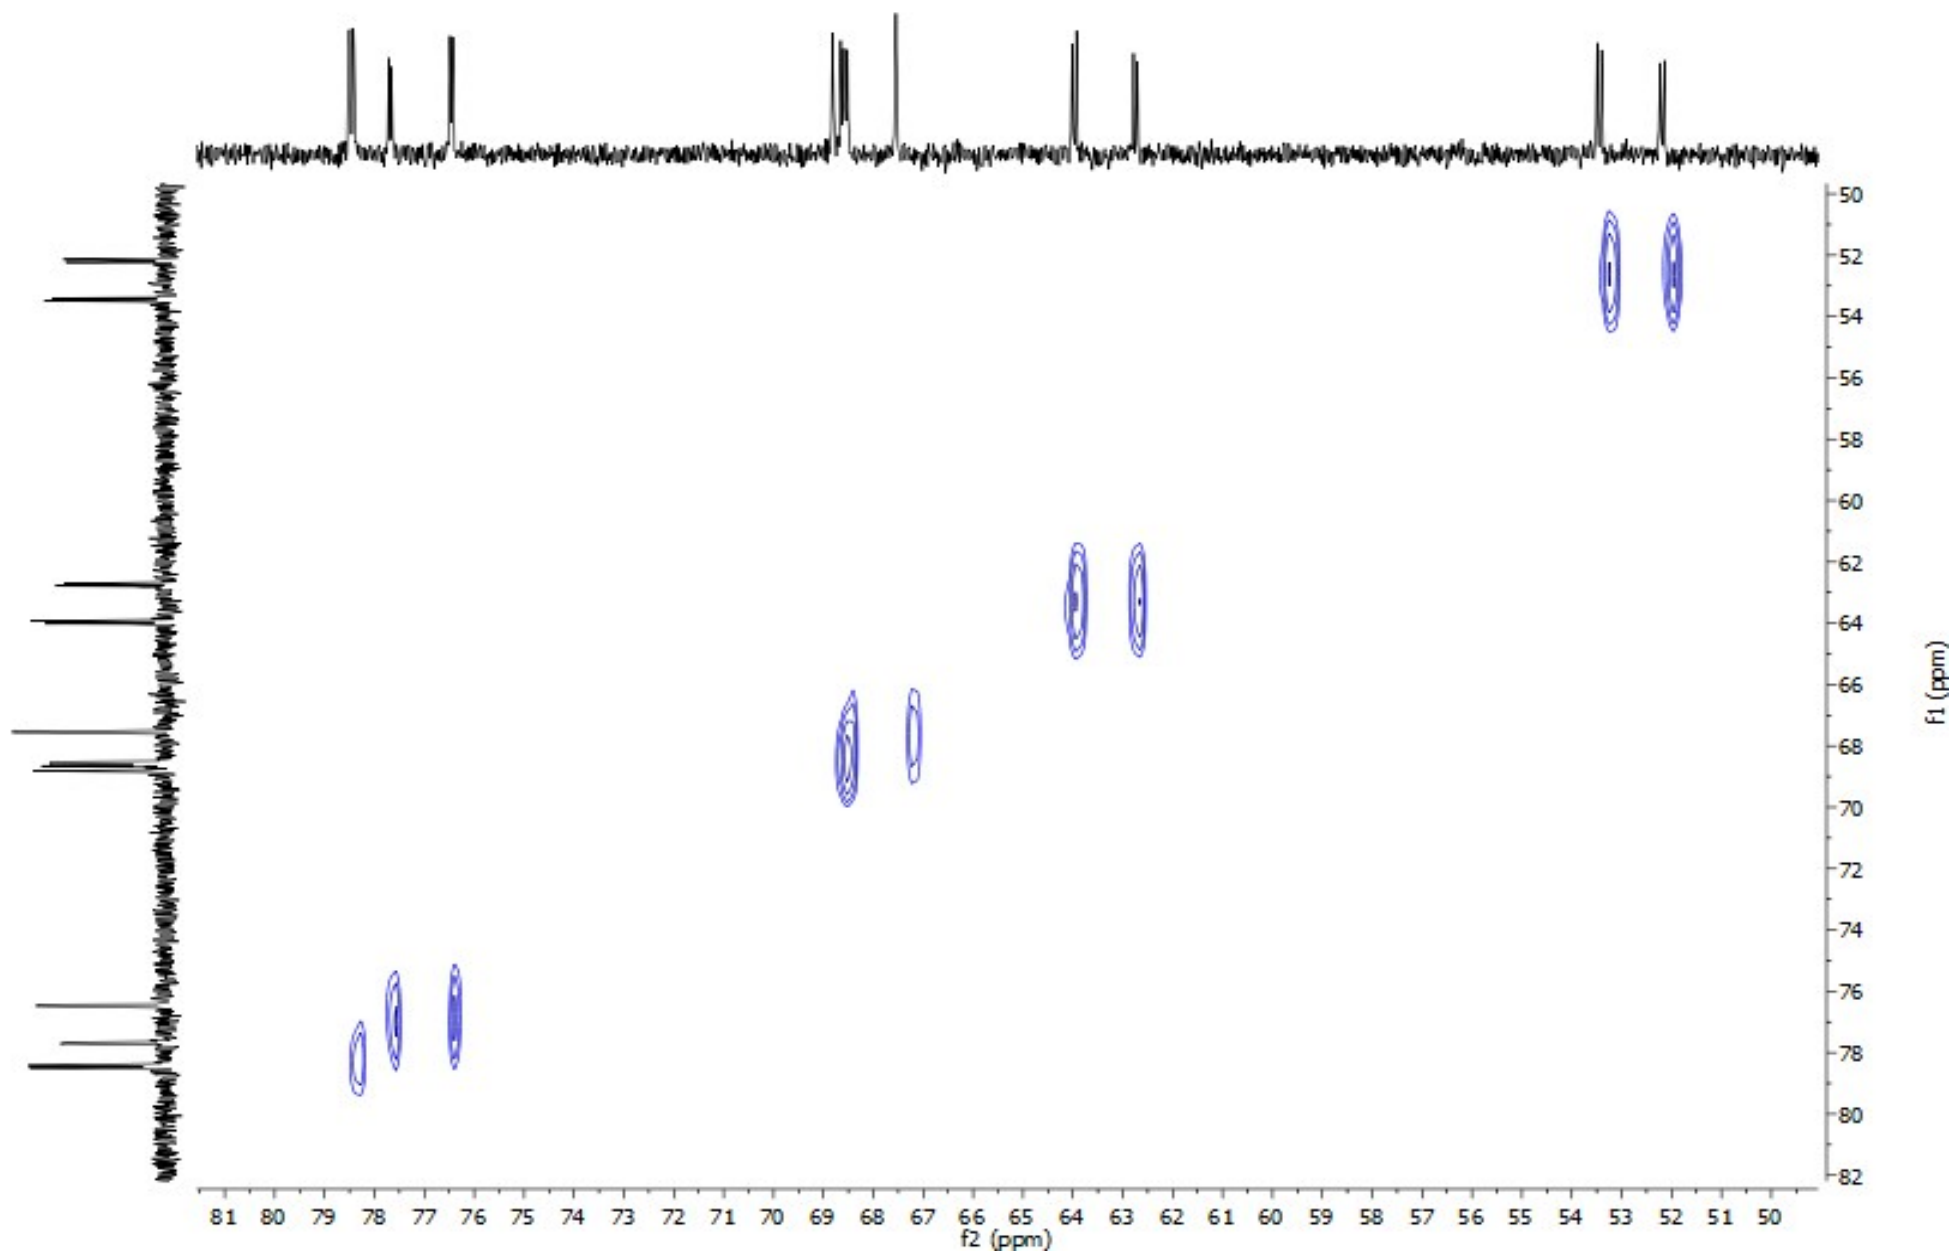

**Fig. S25.**  $^{31}\text{P}\{^1\text{H}\}$  EXSY (202 MHz,  $\text{C}_6\text{D}_6$ , 298 K) of  $[\text{Ru}(\text{dppbz})(\text{PPh}_2(\text{binaphthyl}))\text{ZnMe}]$  (**3**), showing the lack of exchange of diastereomers.

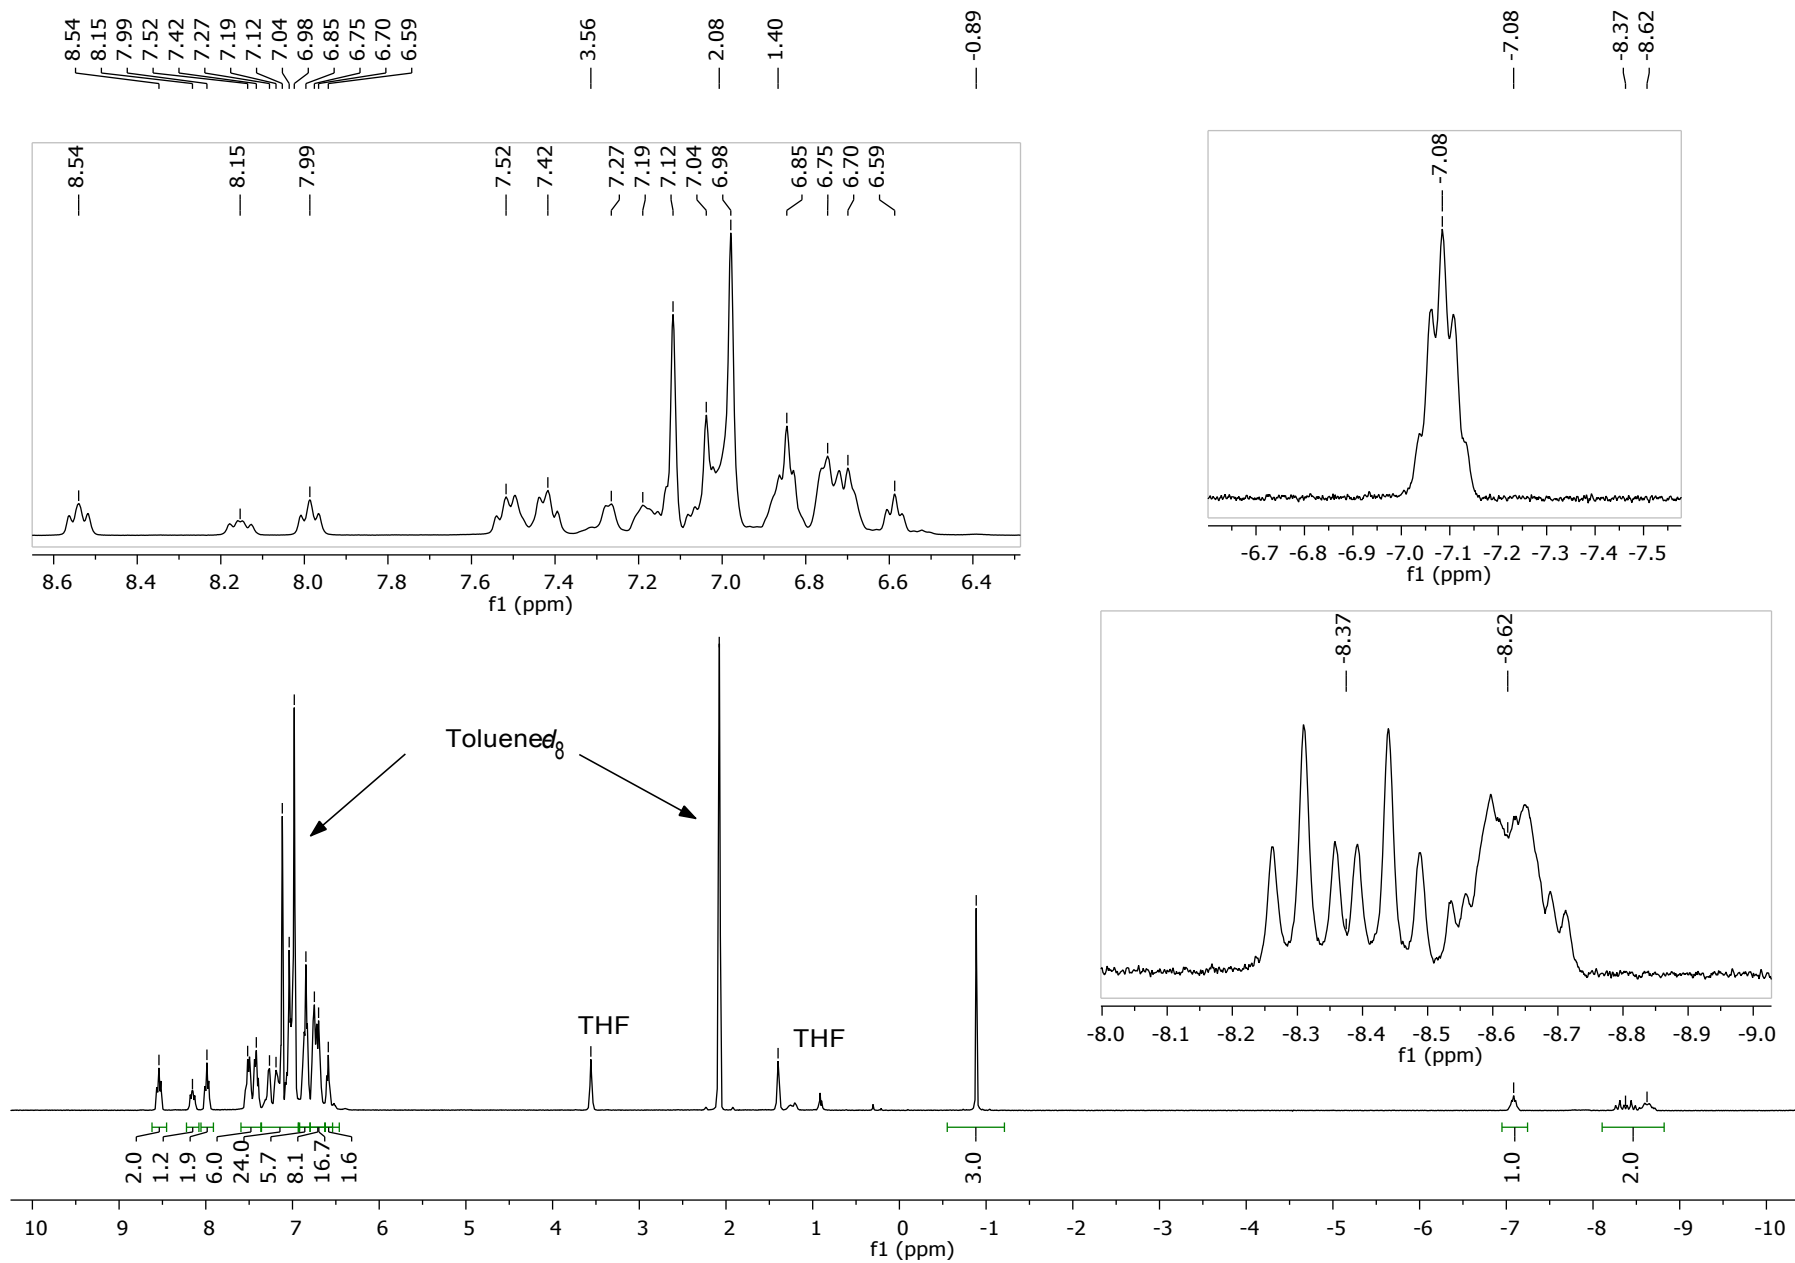

**Fig. S26.**  $^1\text{H}$  NMR spectrum (400 MHz,  $\text{C}_6\text{D}_5\text{CD}_3$ , 246 K) of the reaction of **1** and  $\text{H}_2$  to give  $[\text{Ru}(\text{dppbz})(\text{Ph}_2\text{P}(\text{biphenyl}))(\text{H})_2(\text{H})(\text{ZnMe})]$  (**4**).

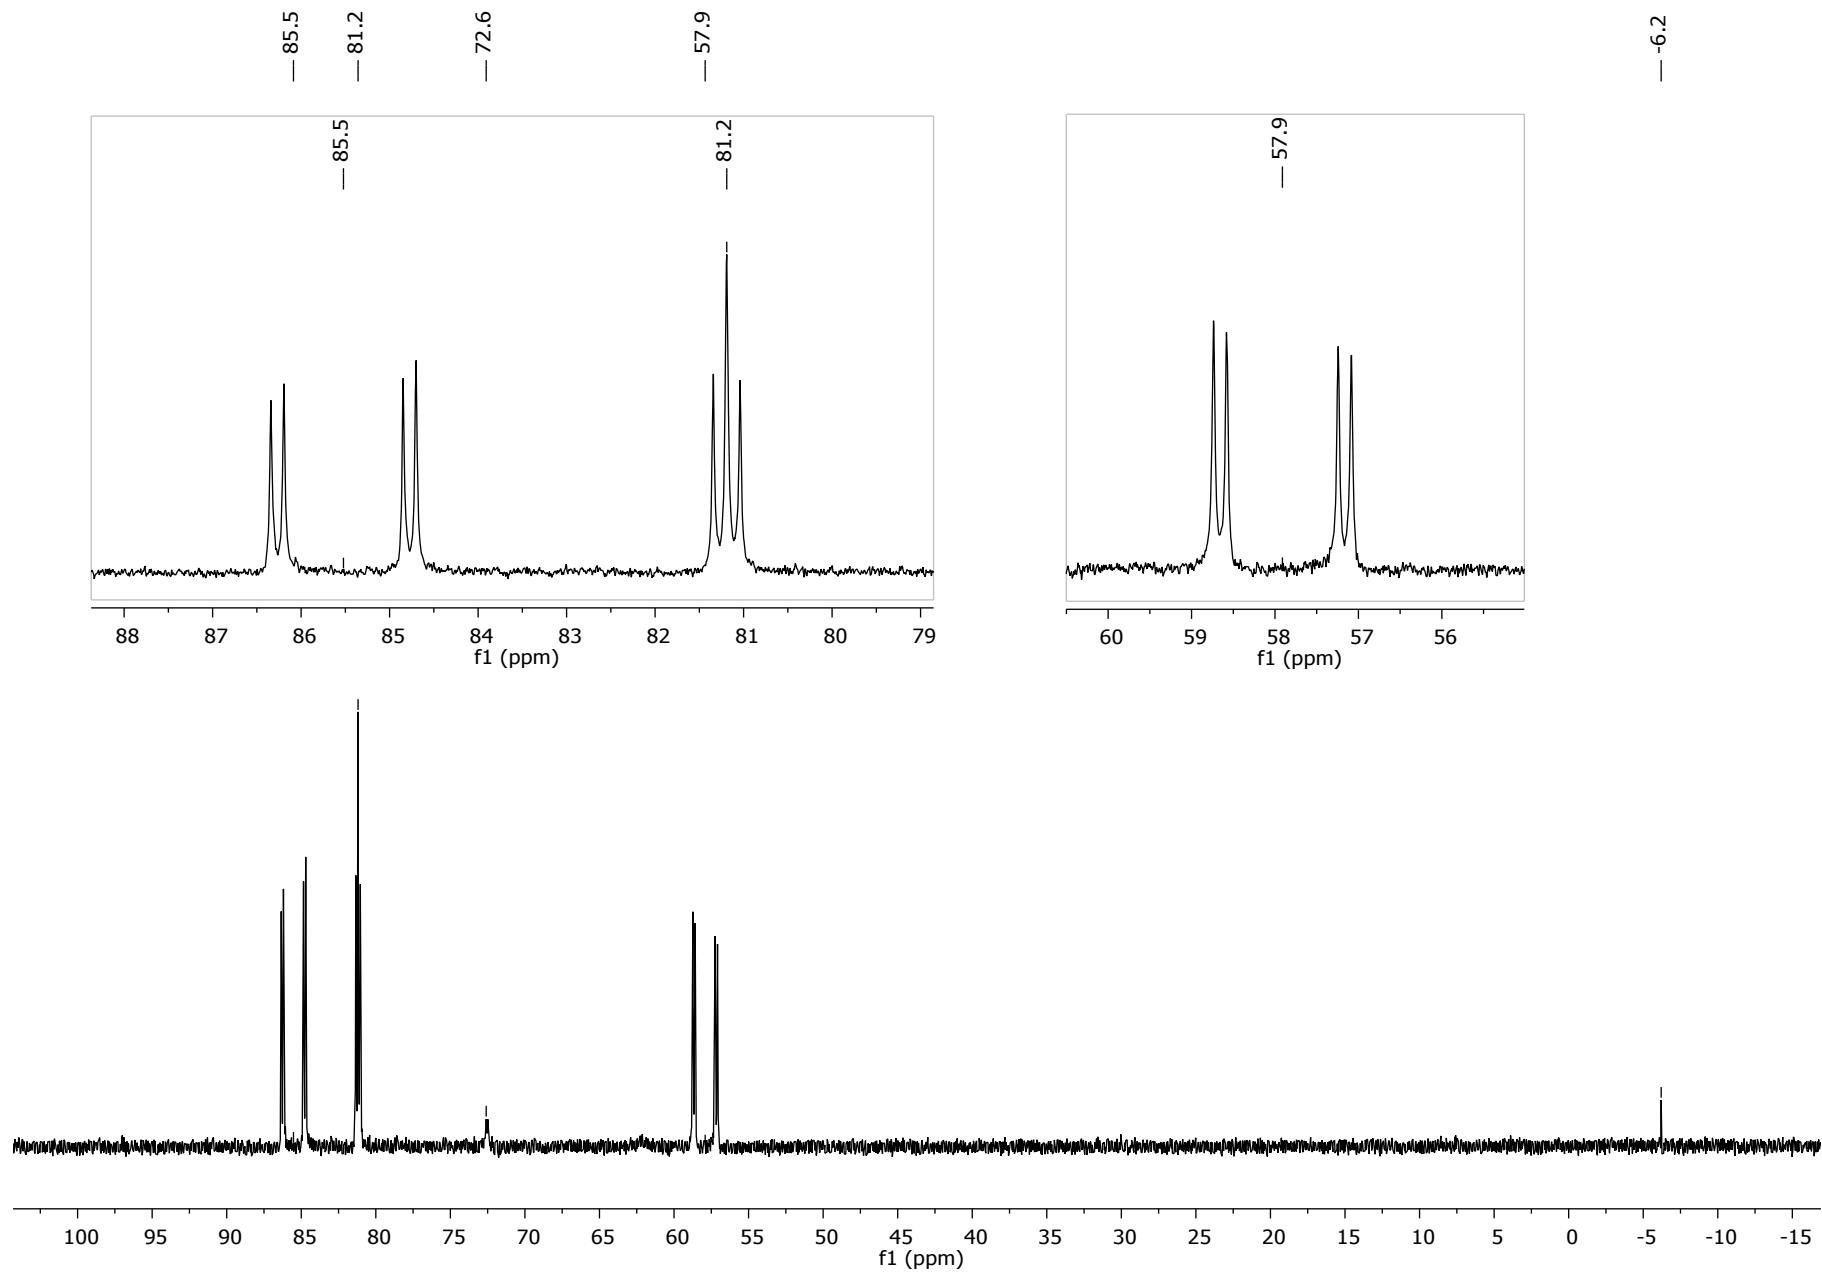

**Fig. S27.**  $^{31}\text{P}\{^1\text{H}\}$  NMR spectrum (162 MHz,  $\text{C}_6\text{D}_5\text{CD}_3$ , 246 K) of reaction of **1** and  $\text{H}_2$  to form  $[\text{Ru}(\text{dppbz})(\text{Ph}_2\text{P}(\text{biphenyl}))(\text{H})_2(\text{H})(\text{ZnMe})]$  (**4**).

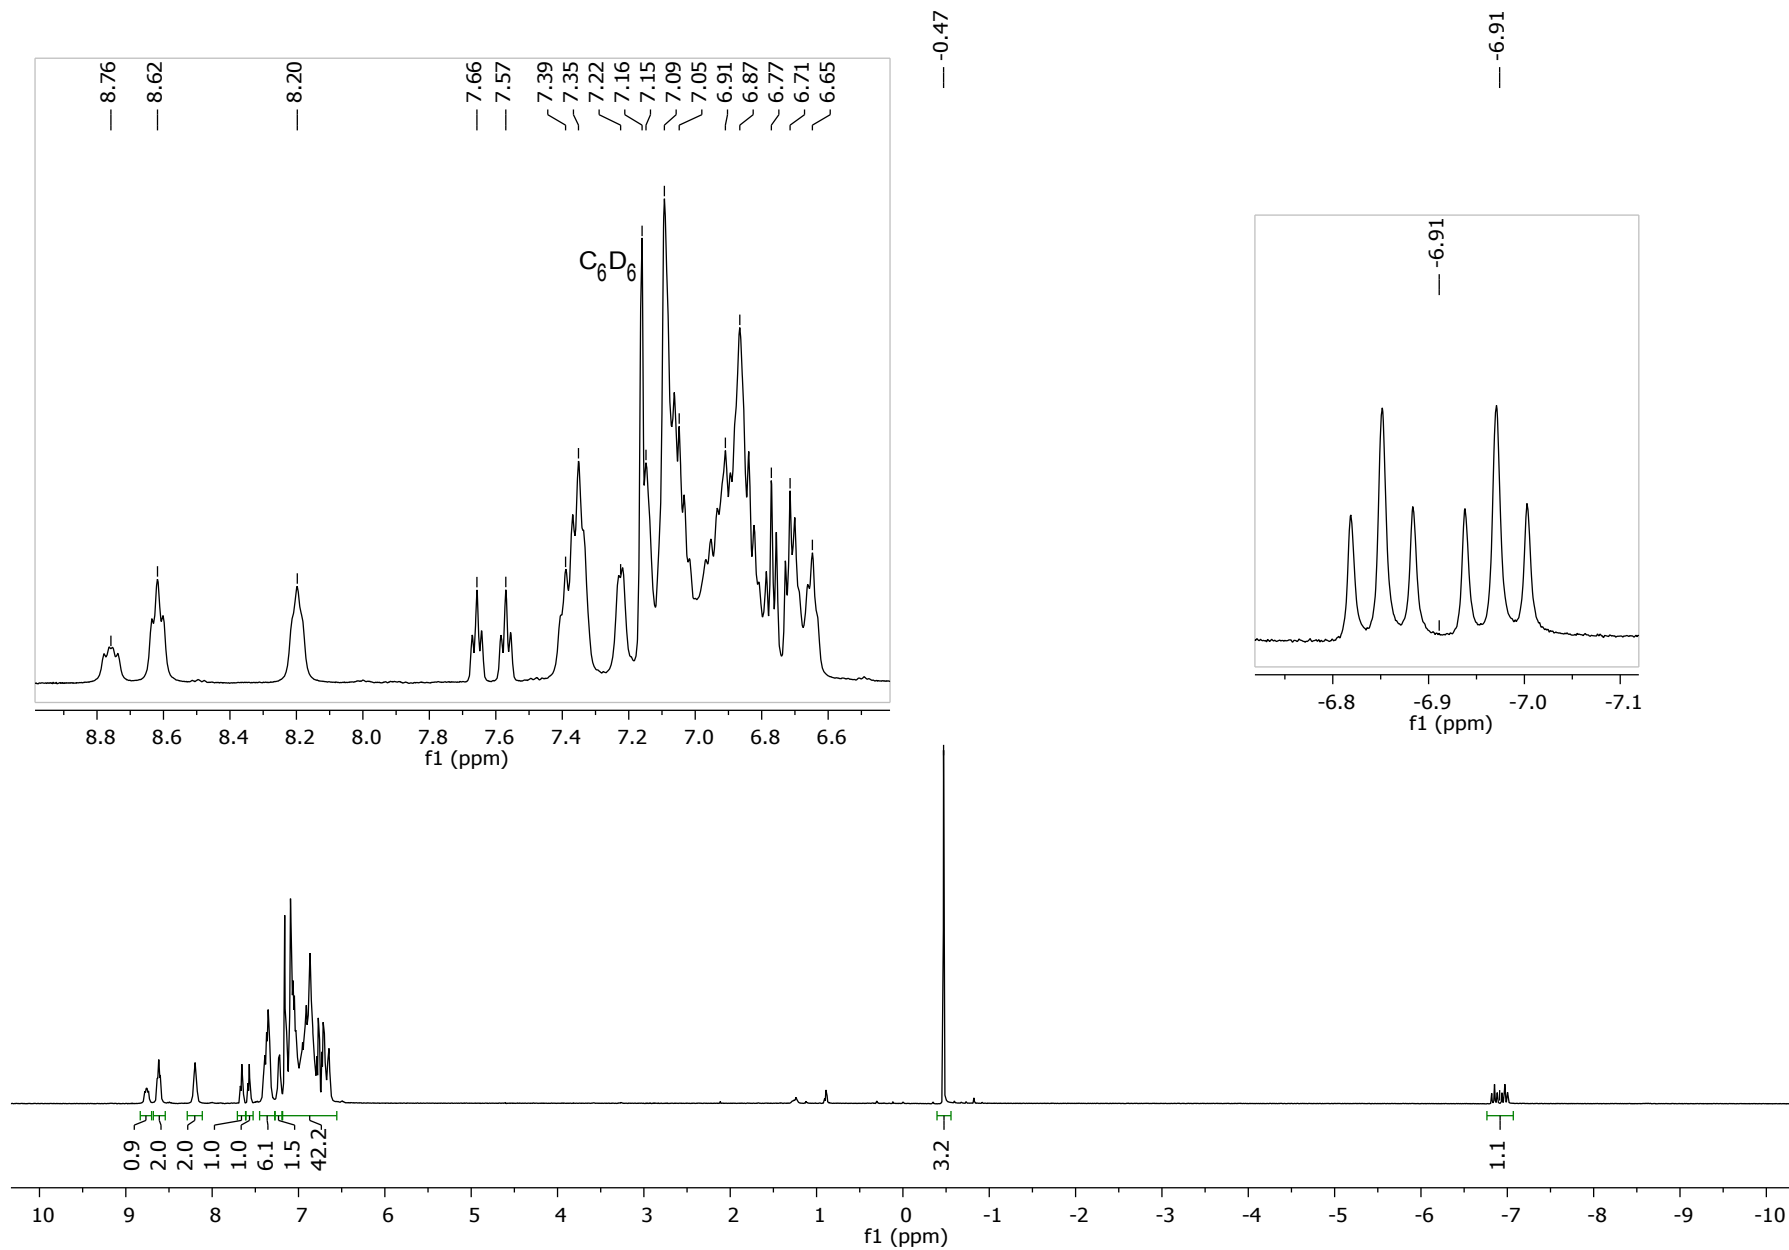

**Fig. S28.**  $^1\text{H}$  NMR spectrum (500 MHz,  $\text{C}_6\text{D}_6$ , 298 K) of  $[\text{Ru}(\text{dppbz})(\text{Ph}_2\text{P}(\text{biphenyl}))(\text{C}\equiv\text{CPh})_2(\text{H})(\text{ZnMe})]$  (5).

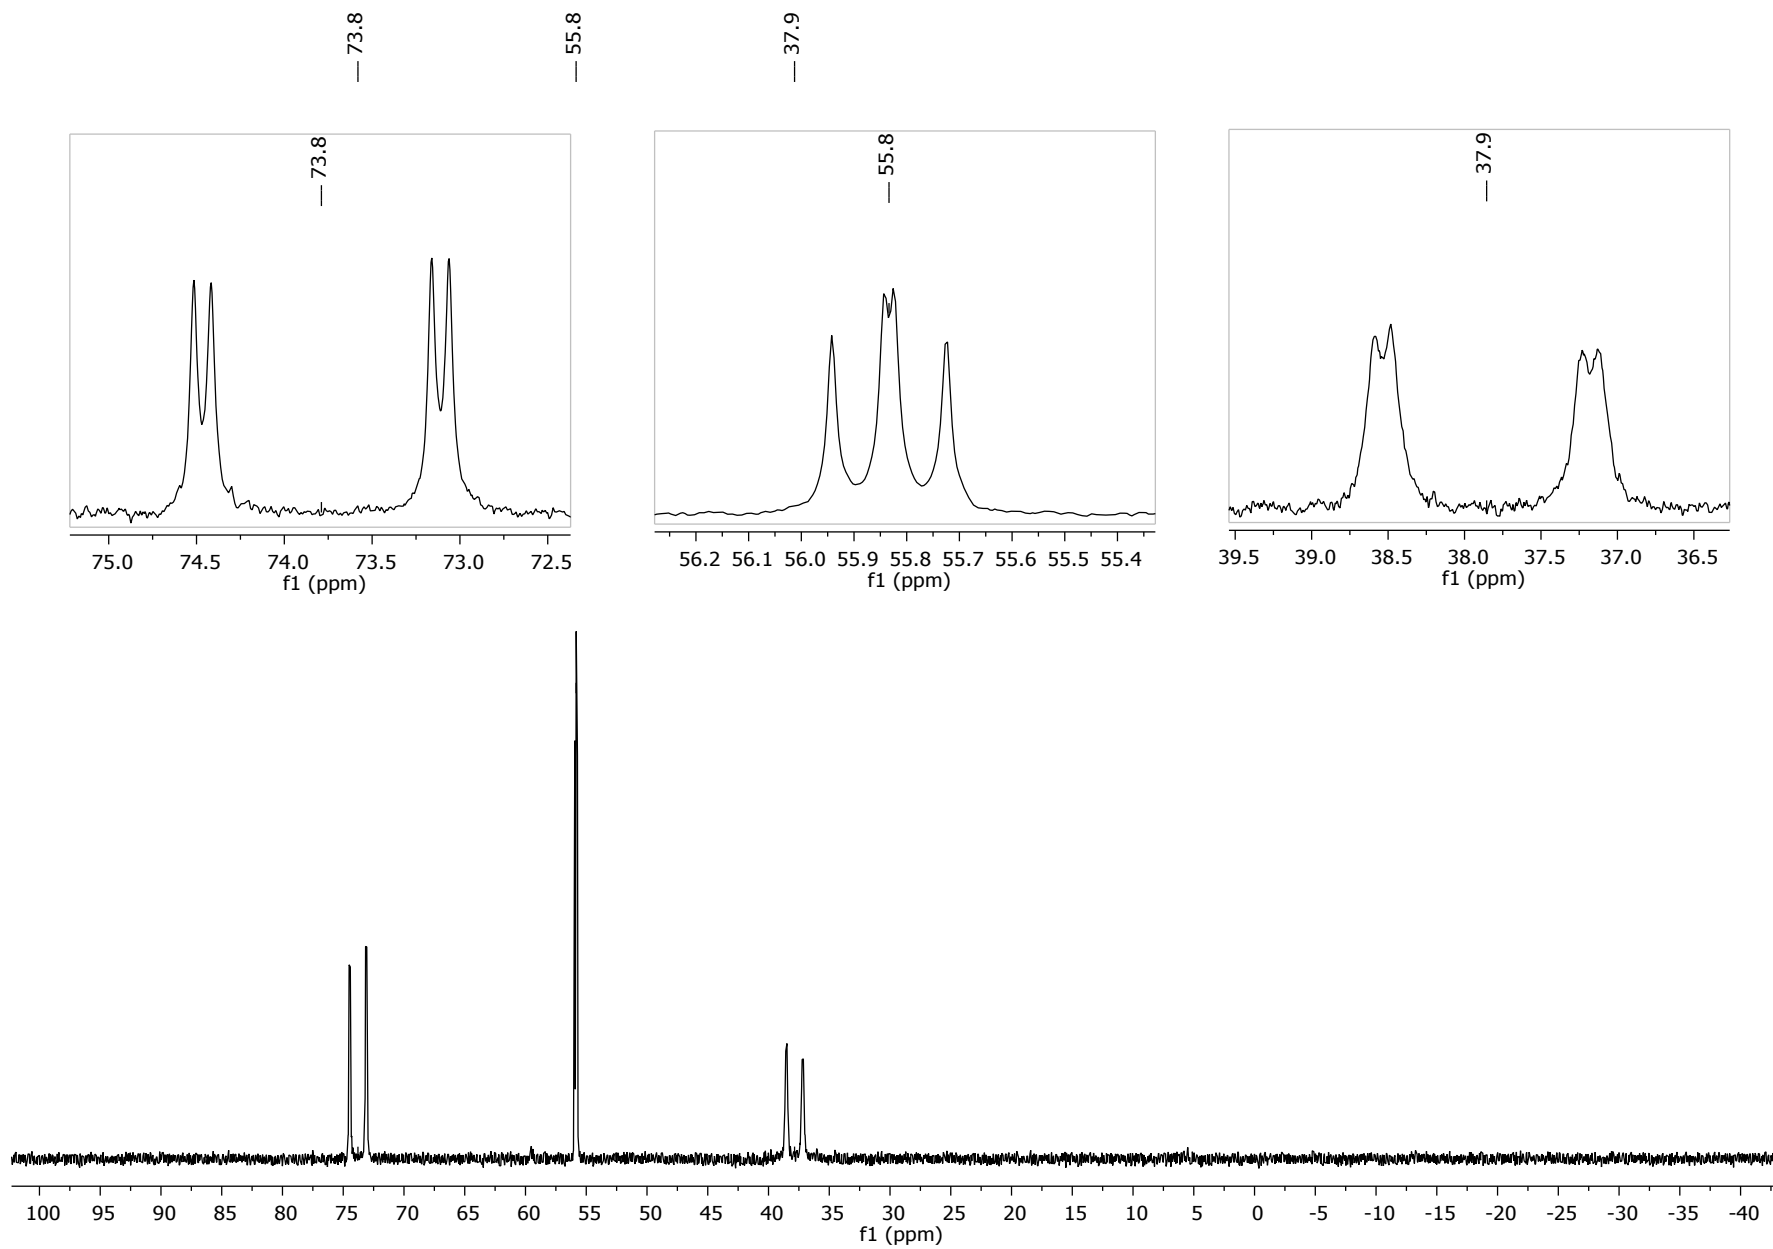

**Fig. S29.**  $^{31}\text{P}\{^1\text{H}\}$  spectrum (202 MHz,  $\text{C}_6\text{D}_6$ , 298 K) of  $[\text{Ru}(\text{dppbz})(\text{Ph}_2\text{P}(\text{biphenyl}))(\text{C}\equiv\text{CPh})_2(\text{H})(\text{ZnMe})]$  (5).

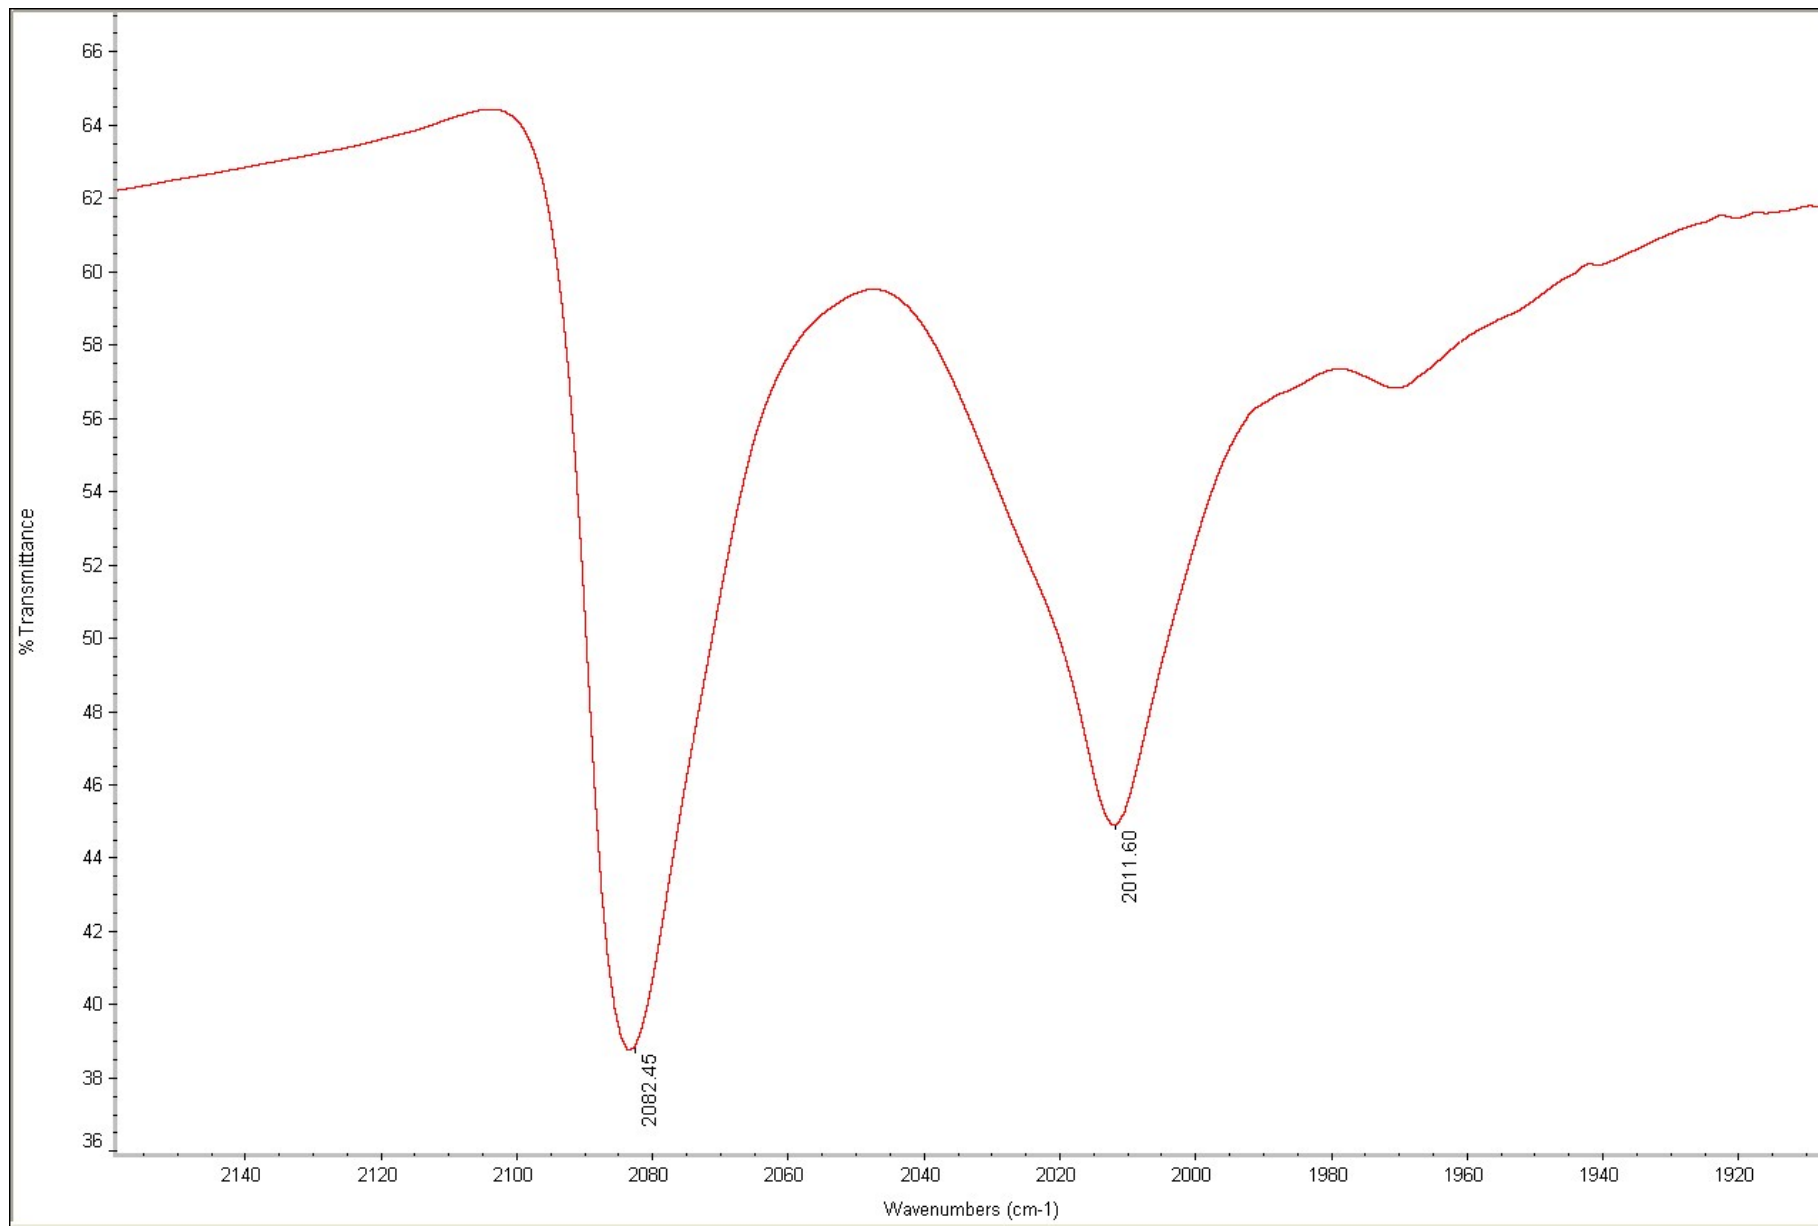

**Fig. S30.** IR spectrum (in KBr) showing  $\nu(\text{C}\equiv\text{C})$  of  $[\text{Ru}(\text{dppbz})(\text{Ph}_2\text{P}(\text{biphenyl}))(\text{C}\equiv\text{CPh})_2(\text{H})(\text{ZnMe})]$  (**5**).

| Identification code                                                 | <b>1</b>                                                           | <b>3</b>                                                            | <b>5</b>                                                            |
|---------------------------------------------------------------------|--------------------------------------------------------------------|---------------------------------------------------------------------|---------------------------------------------------------------------|
| Empirical formula                                                   | C <sub>56</sub> H <sub>59</sub> P <sub>3</sub> RuZn                | C <sub>65</sub> H <sub>53</sub> P <sub>3</sub> RuZnO <sub>0.5</sub> | C <sub>89</sub> H <sub>75</sub> P <sub>3</sub> RuZn                 |
| Formula weight                                                      | 991.38                                                             | 1101.42                                                             | 1403.84                                                             |
| Crystal system                                                      | monoclinic                                                         | triclinic                                                           | orthorhombic                                                        |
| Space group                                                         | <i>P</i> 2 <sub>1</sub> / <i>c</i>                                 | <i>P</i> -1                                                         | <i>Pbca</i>                                                         |
| <i>a</i> / Å                                                        | 11.0520(2)                                                         | 10.8687(2)                                                          | 17.33241(12)                                                        |
| <i>b</i> / Å                                                        | 12.8732(2)                                                         | 12.1871(3)                                                          | 23.86672(17)                                                        |
| <i>c</i> / Å                                                        | 36.3933(6)                                                         | 20.5157(5)                                                          | 33.9755(3)                                                          |
| <i>α</i> / °                                                        | 90                                                                 | 79.451(2)                                                           | 90                                                                  |
| <i>β</i> / °                                                        | 98.665(2)                                                          | 81.396(2)                                                           | 90                                                                  |
| <i>γ</i> / °                                                        | 90                                                                 | 80.252(2)                                                           | 90                                                                  |
| <i>U</i> / Å <sup>3</sup>                                           | 5118.74(15)                                                        | 2613.17(11)                                                         | 14054.58(18)                                                        |
| <i>Z</i>                                                            | 4                                                                  | 2                                                                   | 8                                                                   |
| $\rho_{\text{calc}}$ / g cm <sup>-3</sup>                           | 1.286                                                              | 1.400                                                               | 1.327                                                               |
| $\mu$ / mm <sup>-1</sup>                                            | 0.892                                                              | 4.092                                                               | 3.158                                                               |
| <i>F</i> (000)                                                      | 2056.0                                                             | 1132.0                                                              | 5824.0                                                              |
| Crystal size/ mm <sup>3</sup>                                       | 0.577 × 0.42 × 0.383                                               | 0.169 × 0.136 × 0.064                                               | 0.124 × 0.108 × 0.069                                               |
| 2 $\theta$ range for data collection/°                              | 6.724 to 52.792                                                    | 8.03 to 146.214                                                     | 6.818 to 146.212                                                    |
| Index ranges                                                        | -9 ≤ <i>h</i> ≤ 13,<br>-16 ≤ <i>k</i> ≤ 15,<br>-45 ≤ <i>l</i> ≤ 45 | -13 ≤ <i>h</i> ≤ 8,<br>-15 ≤ <i>k</i> ≤ 15,<br>-25 ≤ <i>l</i> ≤ 25  | -19 ≤ <i>h</i> ≤ 21,<br>-27 ≤ <i>k</i> ≤ 29,<br>-39 ≤ <i>l</i> ≤ 42 |
| Reflections collected                                               | 43780                                                              | 30751                                                               | 102521                                                              |
| Independent reflections, <i>R</i> <sub>int</sub>                    | 10443, 0.0184                                                      | 10334, 0.0333                                                       | 14001, 0.0619                                                       |
| Data/restraints/parameters                                          | 10443/0/542                                                        | 10334/265/858                                                       | 14001/0/852                                                         |
| Goodness-of-fit on <i>F</i> <sup>2</sup>                            | 1.119                                                              | 1.028                                                               | 1.014                                                               |
| Final <i>R</i> 1, <i>wR</i> 2 [ <i>I</i> ≥ 2 $\sigma$ ( <i>I</i> )] | 0.0297, 0.0662                                                     | 0.0306, 0.0734                                                      | 0.0293, 0.0715                                                      |
| Final <i>R</i> 1, <i>wR</i> 2 [all data]                            | 0.0321, 0.0671                                                     | 0.0338, 0.0755                                                      | 0.0346, 0.0749                                                      |
| Largest diff. peak/hole/ e Å <sup>-3</sup>                          | 0.44/-0.44                                                         | 0.67/-0.60                                                          | 0.59/-0.71                                                          |

**Table S1.** Crystal data and structure refinement details for **1**, **3** and **5**.
